# Supplementary material for: Evaluation of 16S rRNA gene sequencing for species and strain-level microbiome analysis
Source: PubMed Central journal article supplement (PMC6834636; doi:10.1038/s41467-019-13036-1), 2019-11-06
Supplement: 41467_2019_13036_MOESM1_ESM.pdf [file 41467_2019_13036_MOESM1_ESM.pdf]

## **Supplementary Information**

### **Evaluation of 16S rRNA gene sequencing for species and strain-level microbiome analysis**

Johnson et al.

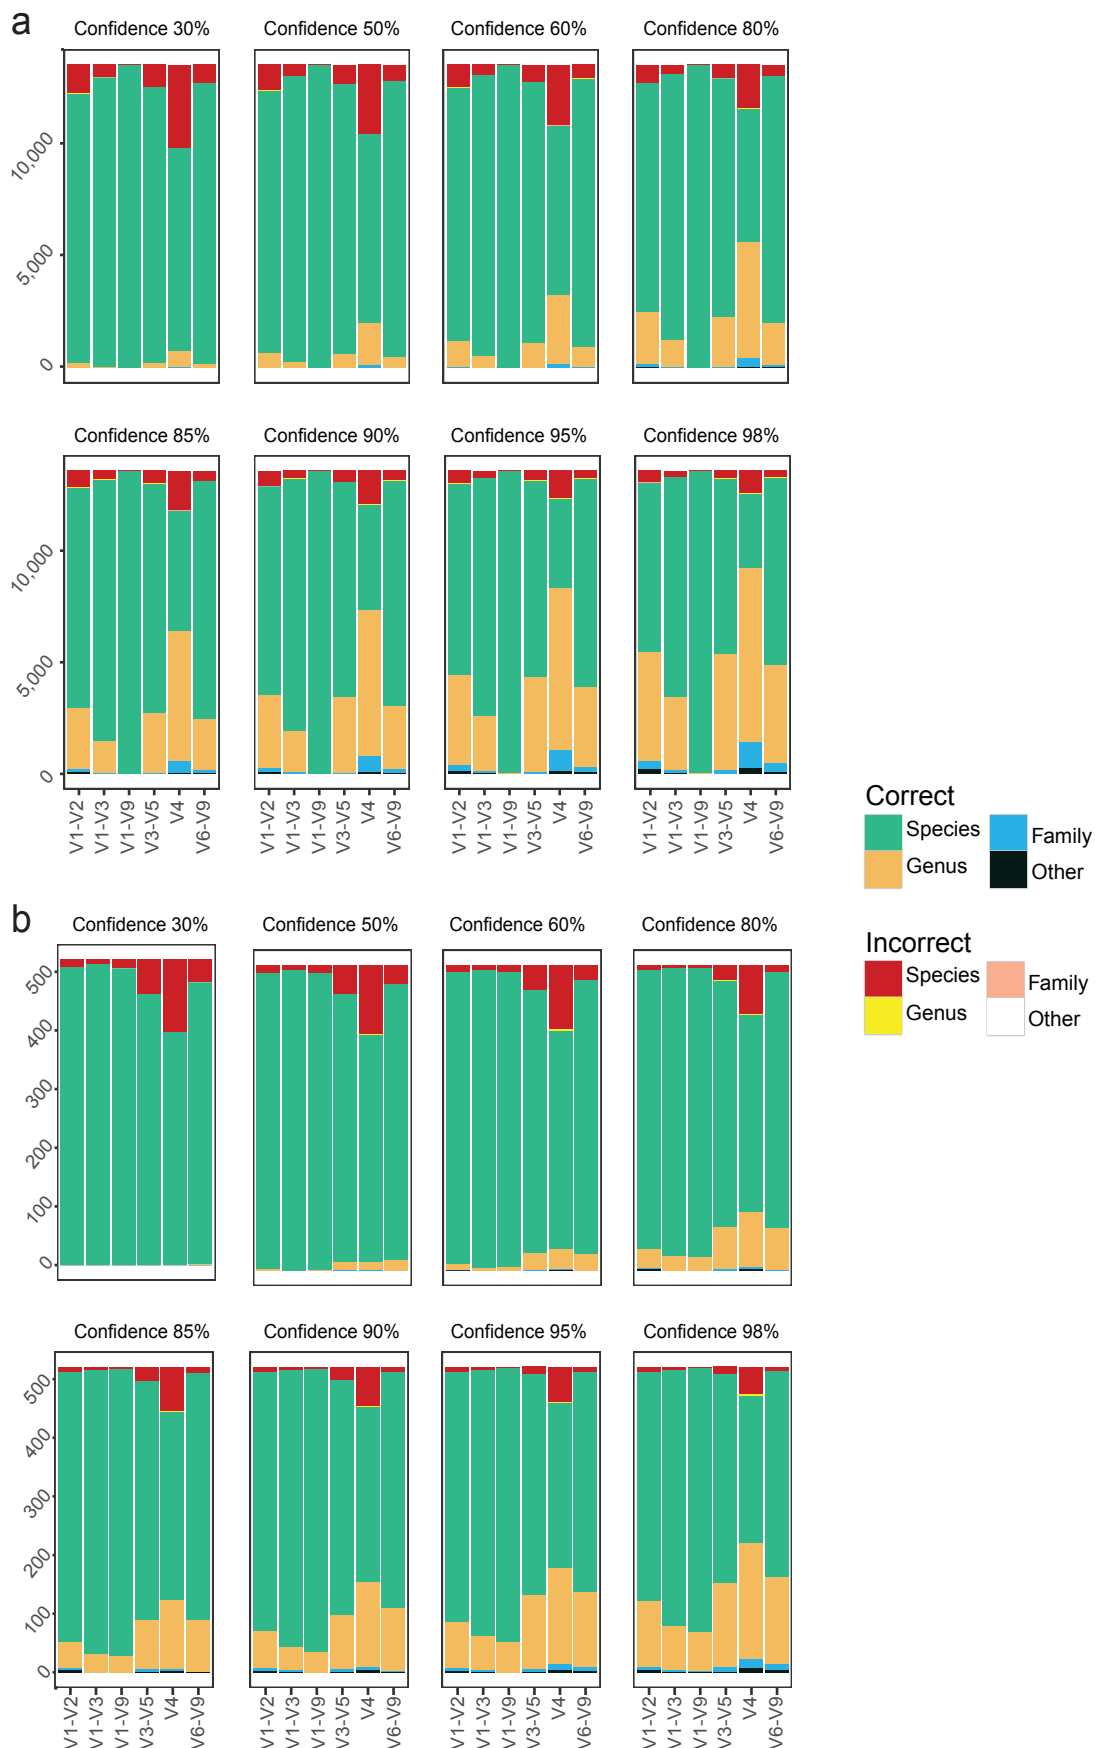

**Supplementary Figure 1:** The success with which *in silico* amplicons can be reclassified to the correct species, shown for a) GreenGenes and b) HOMD databases. The RDP classifier returns a lowest possible taxonomic prediction for a given confidence threshold. Stacked bar charts indicate both the taxonomic level at which a prediction was returned and whether that prediction was correct. Source data are provided as a Source Data file.

a

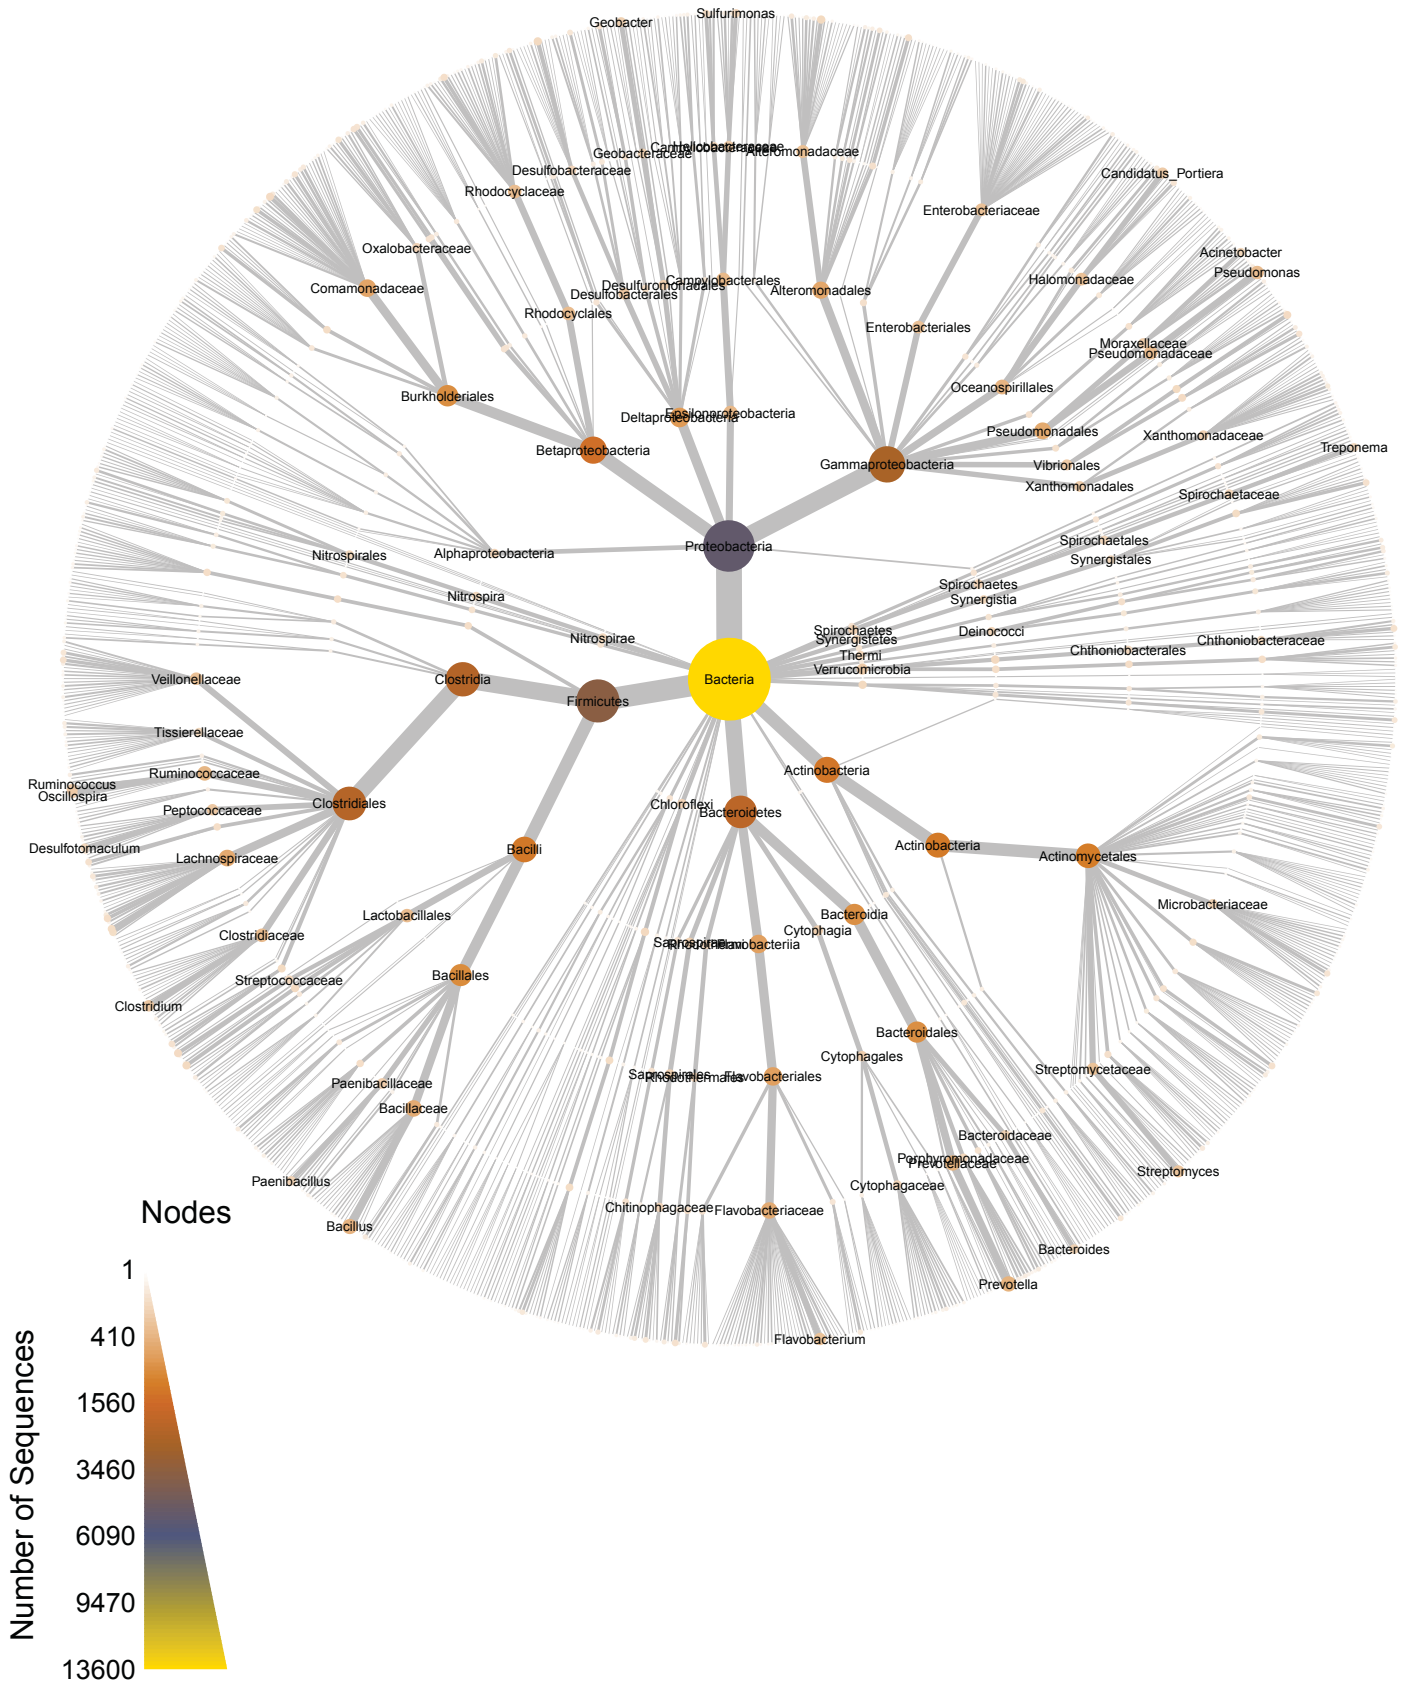

b  
V1-V2

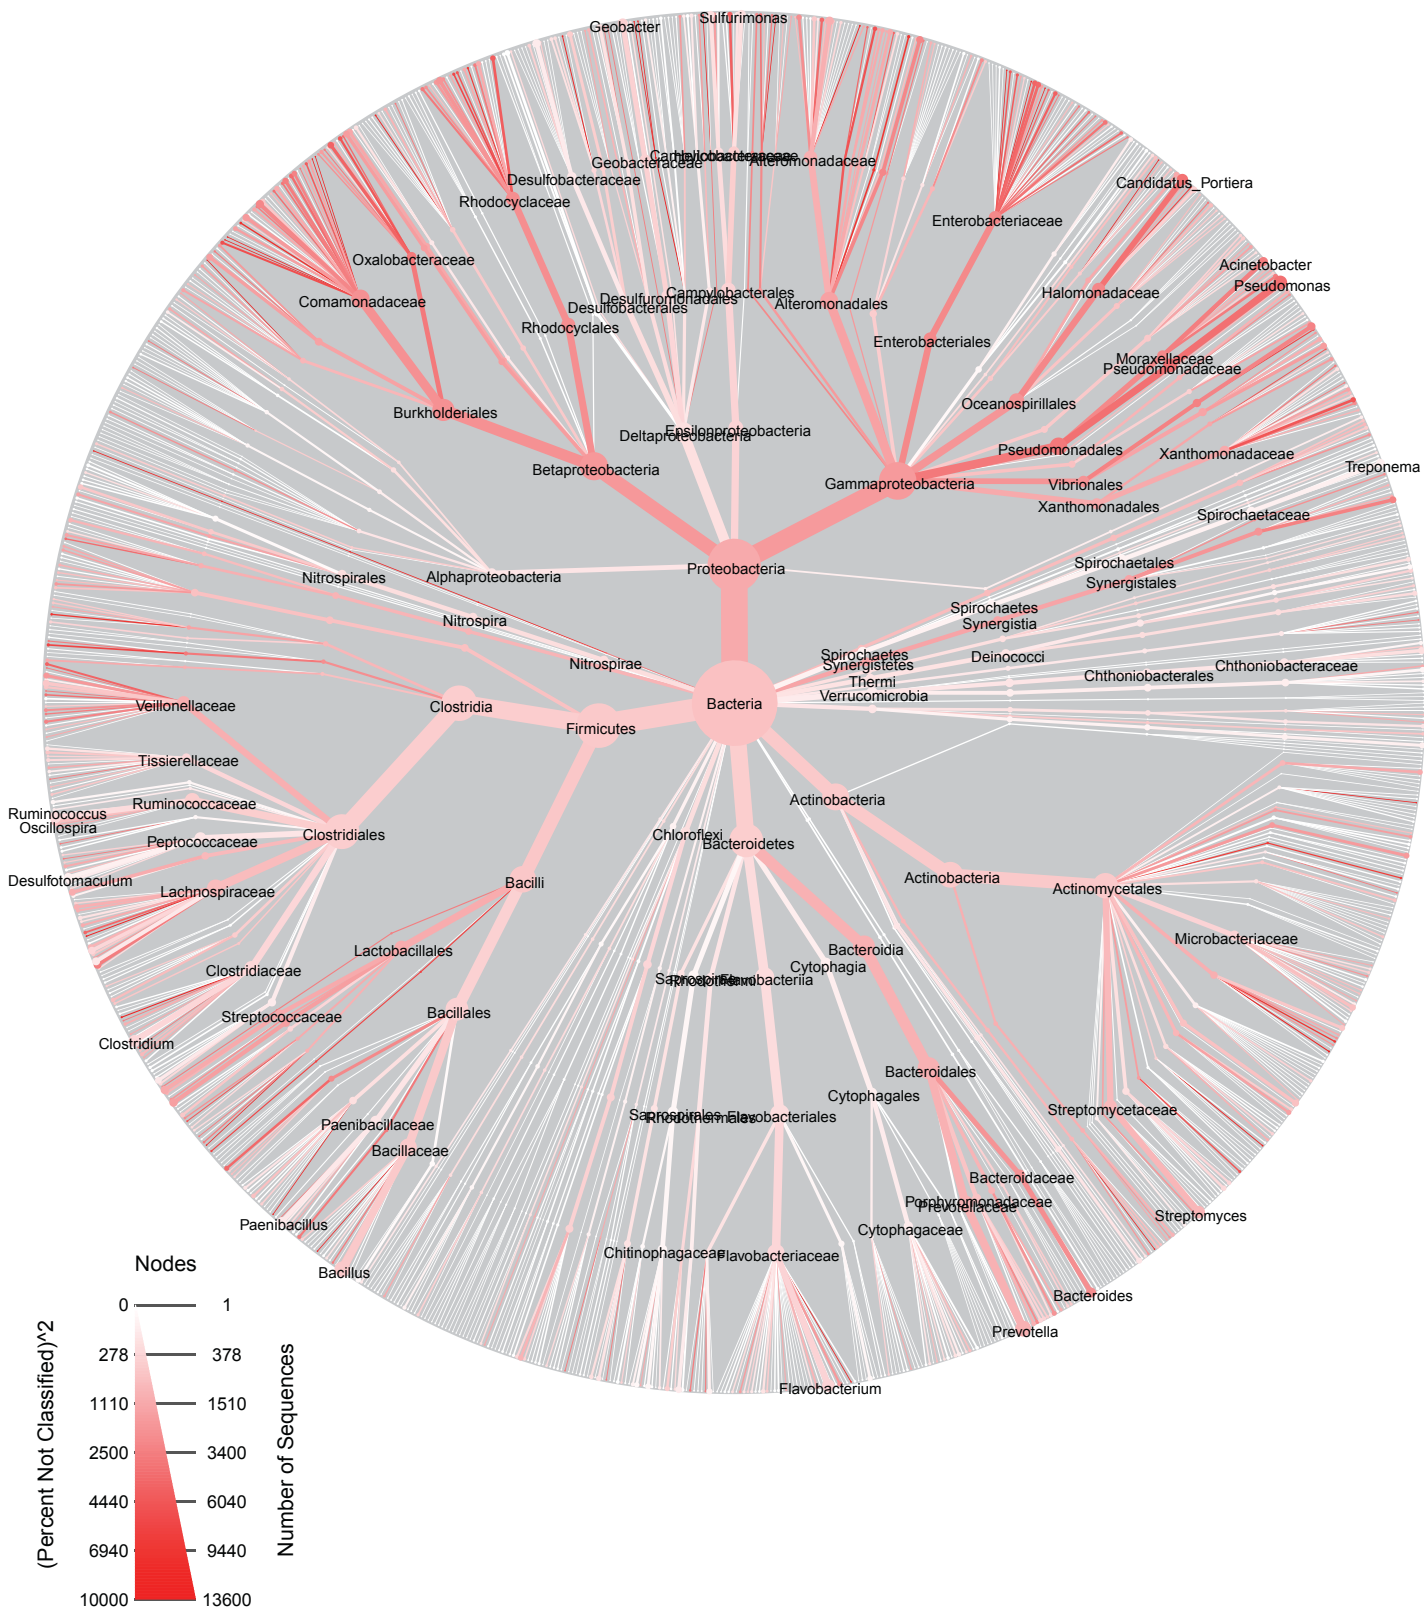

# C

## V1-V3

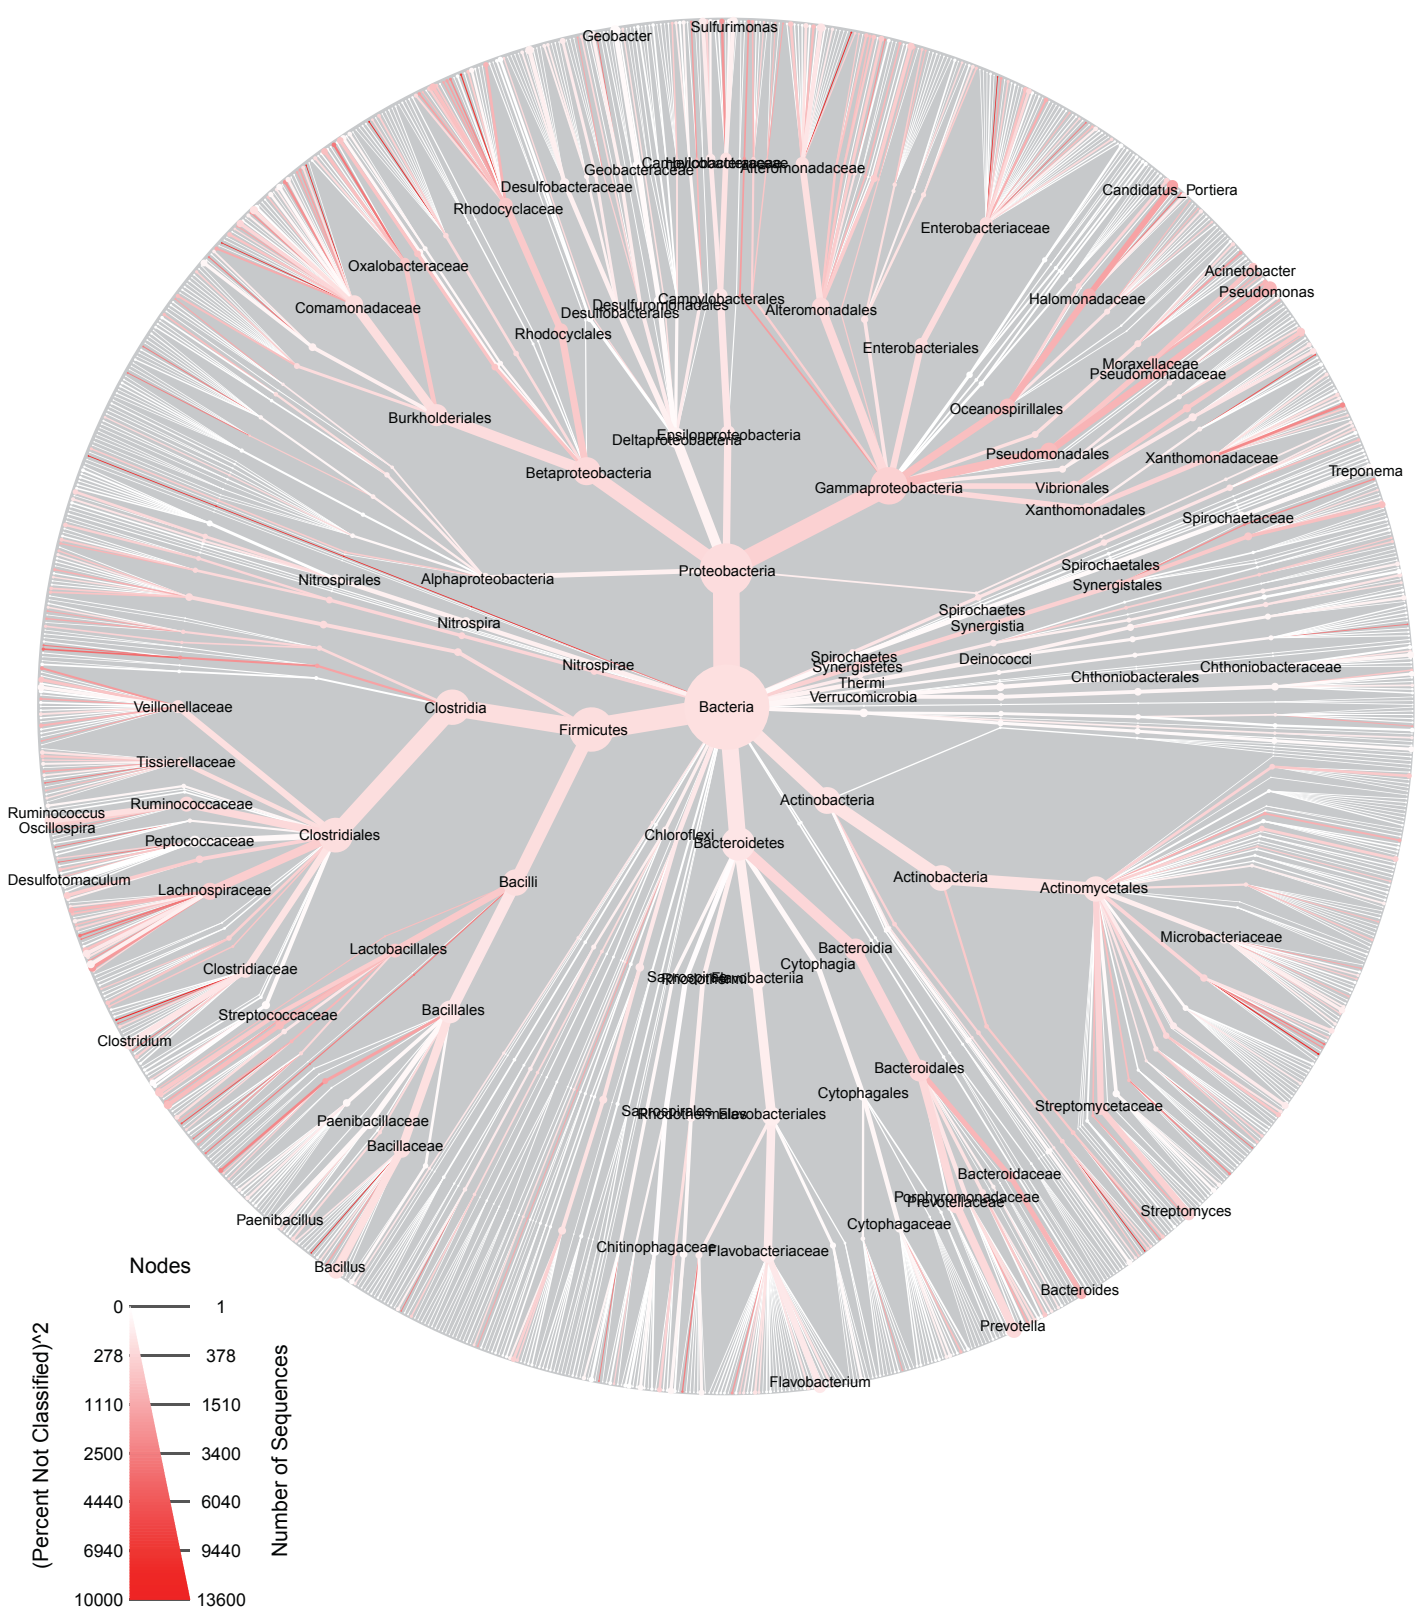

d  
V1-V9

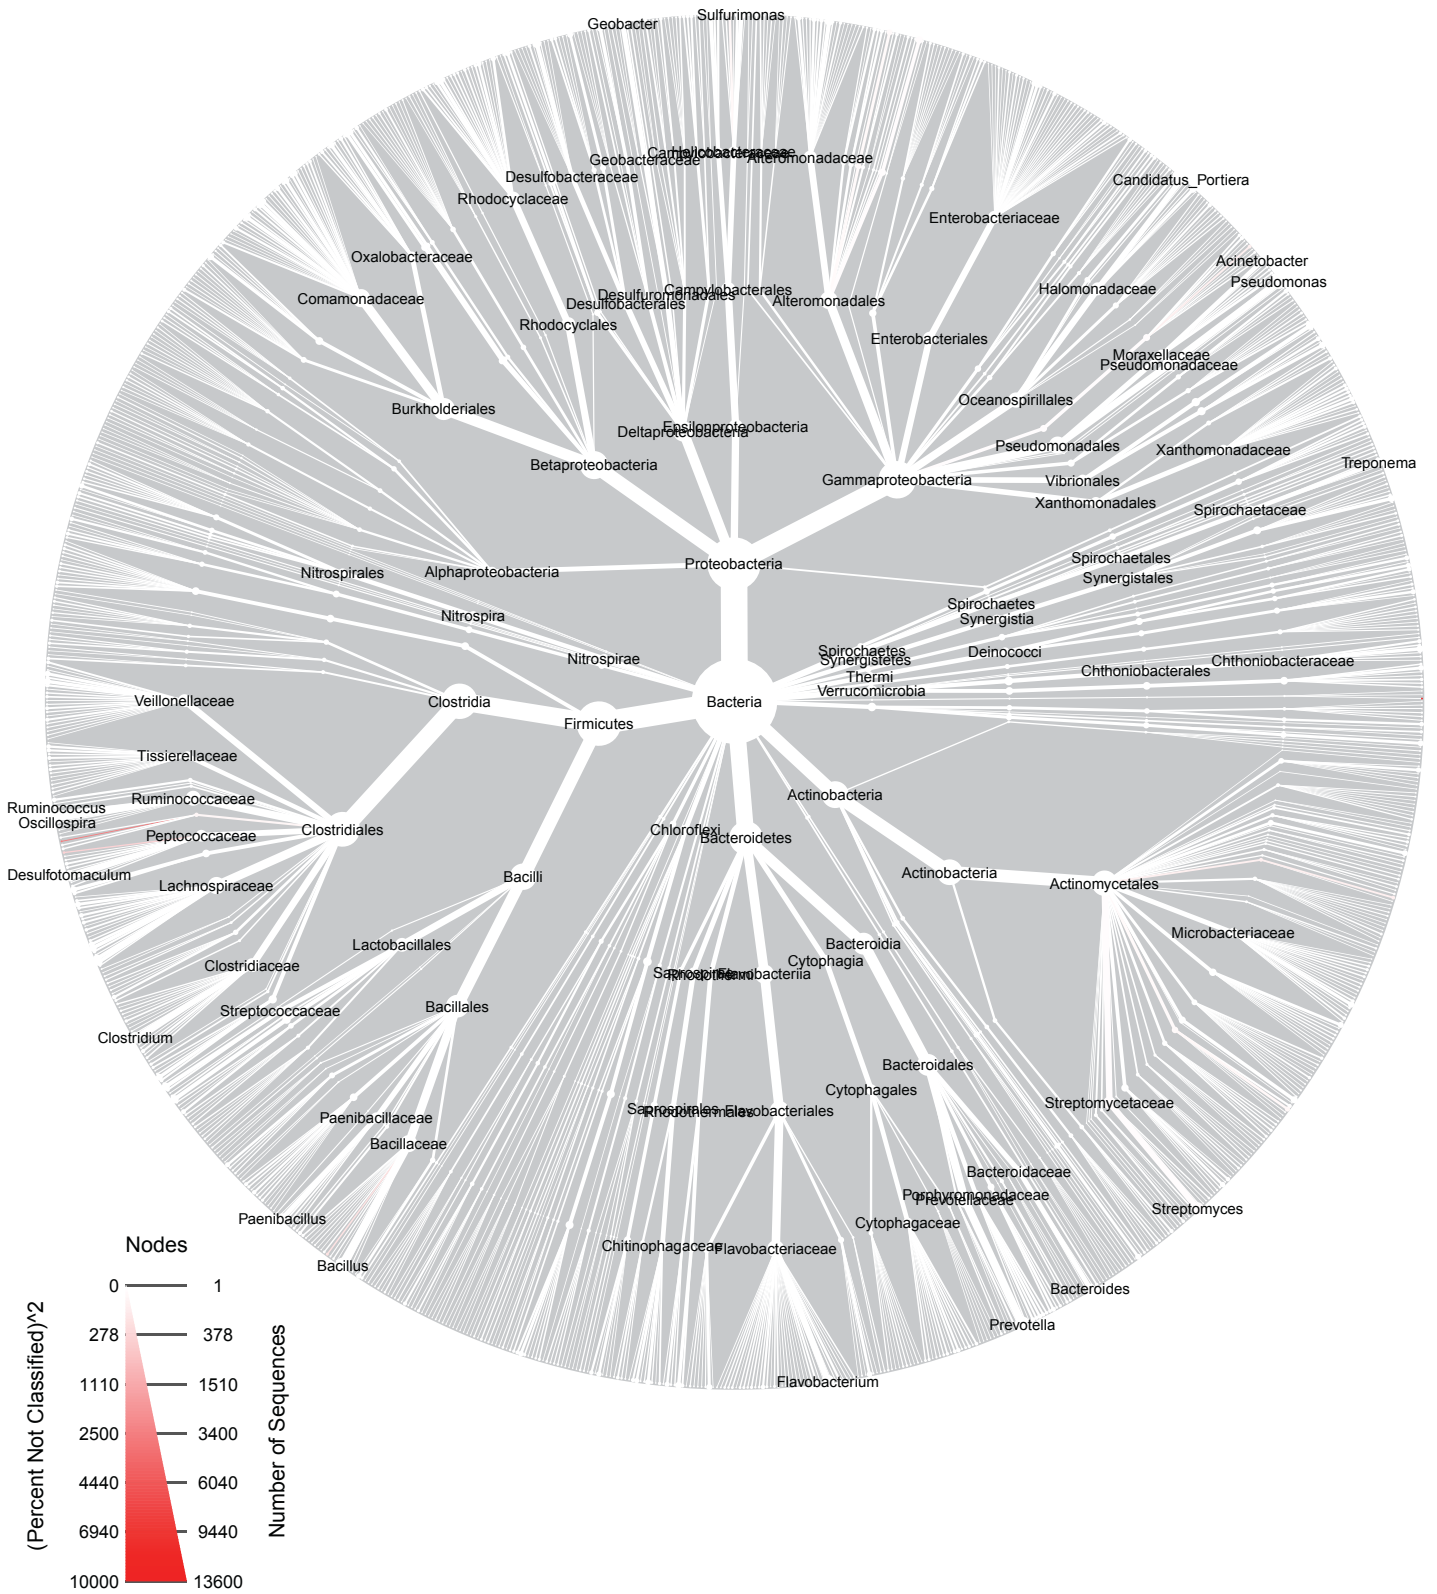

e  
V3-V5

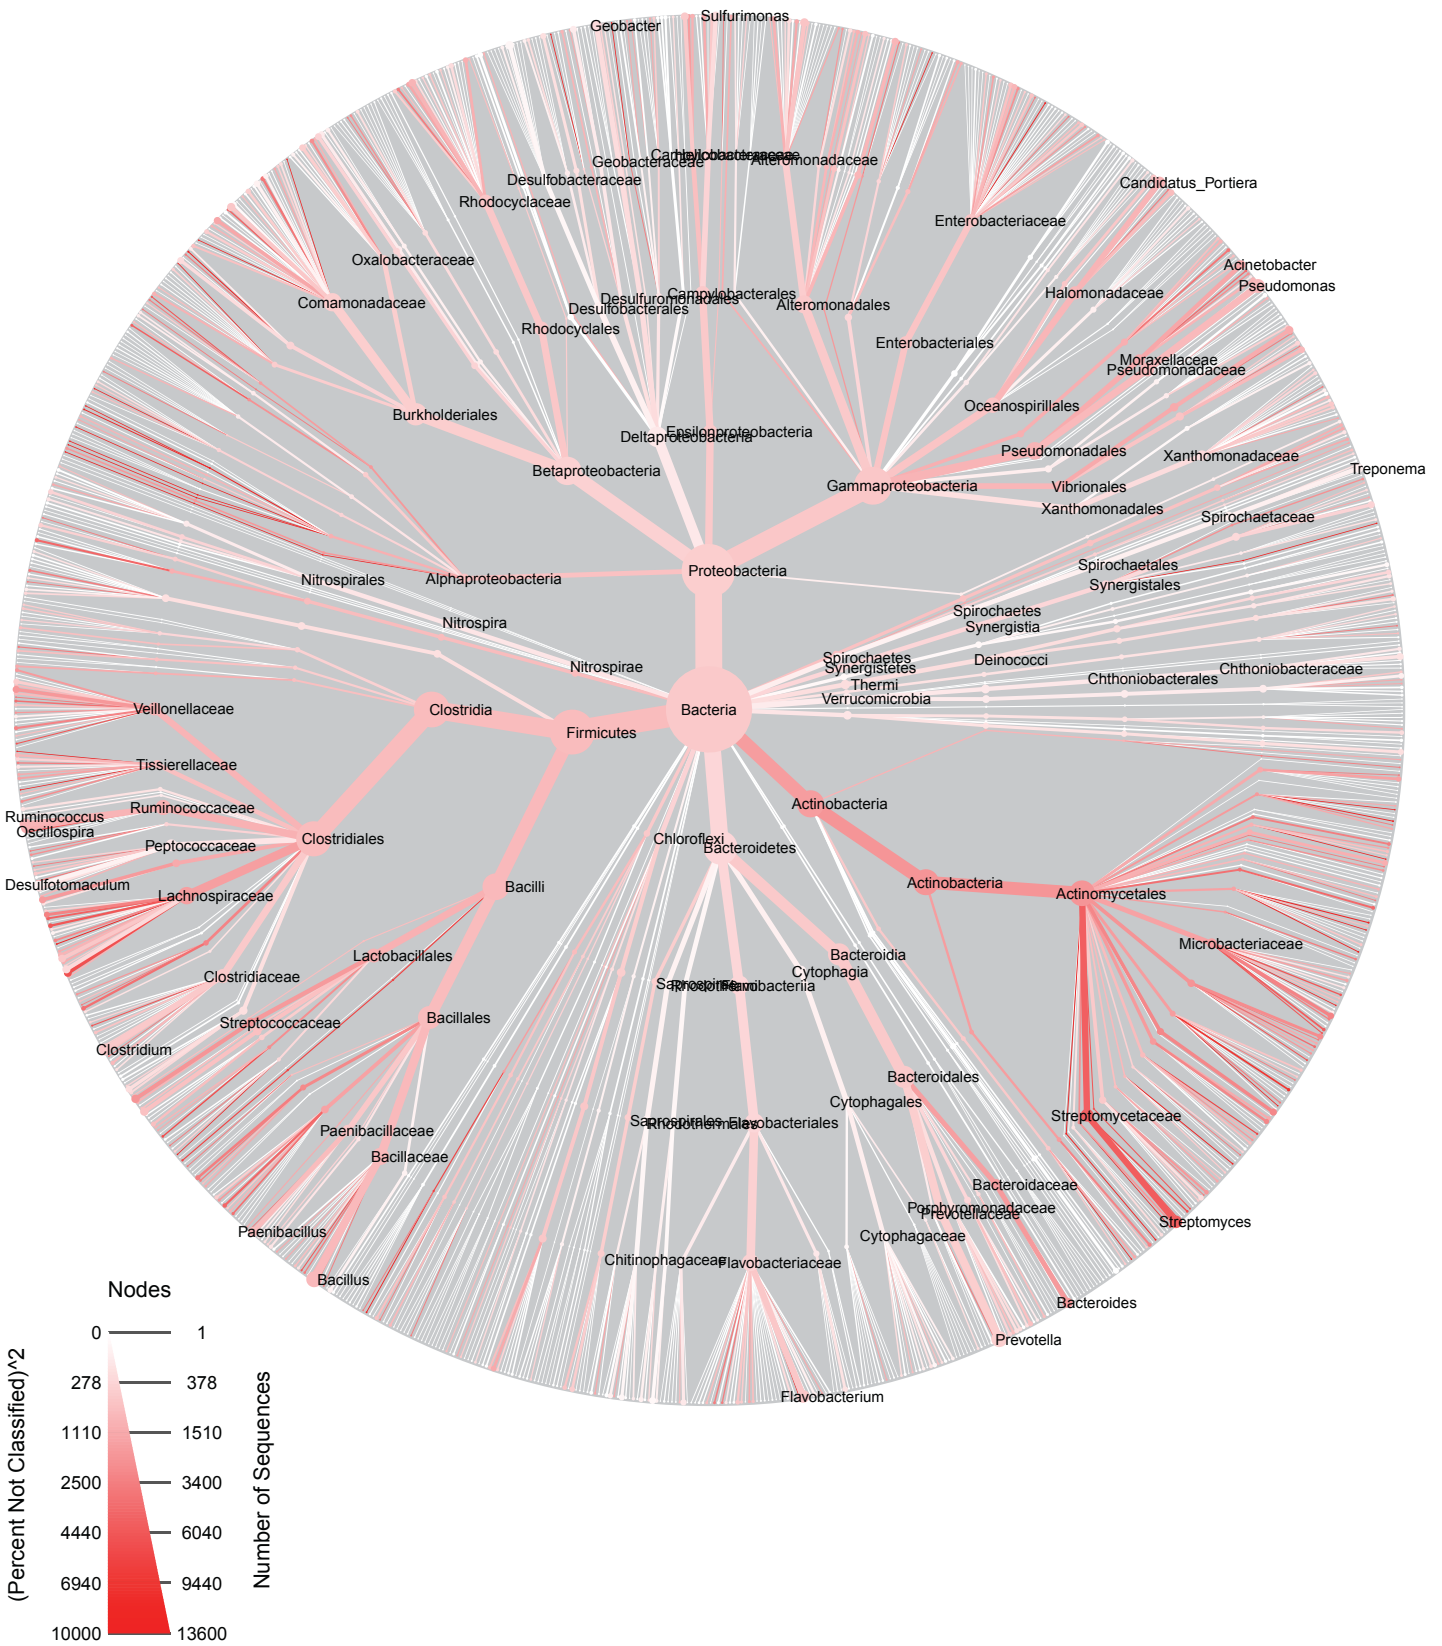

f  
V4

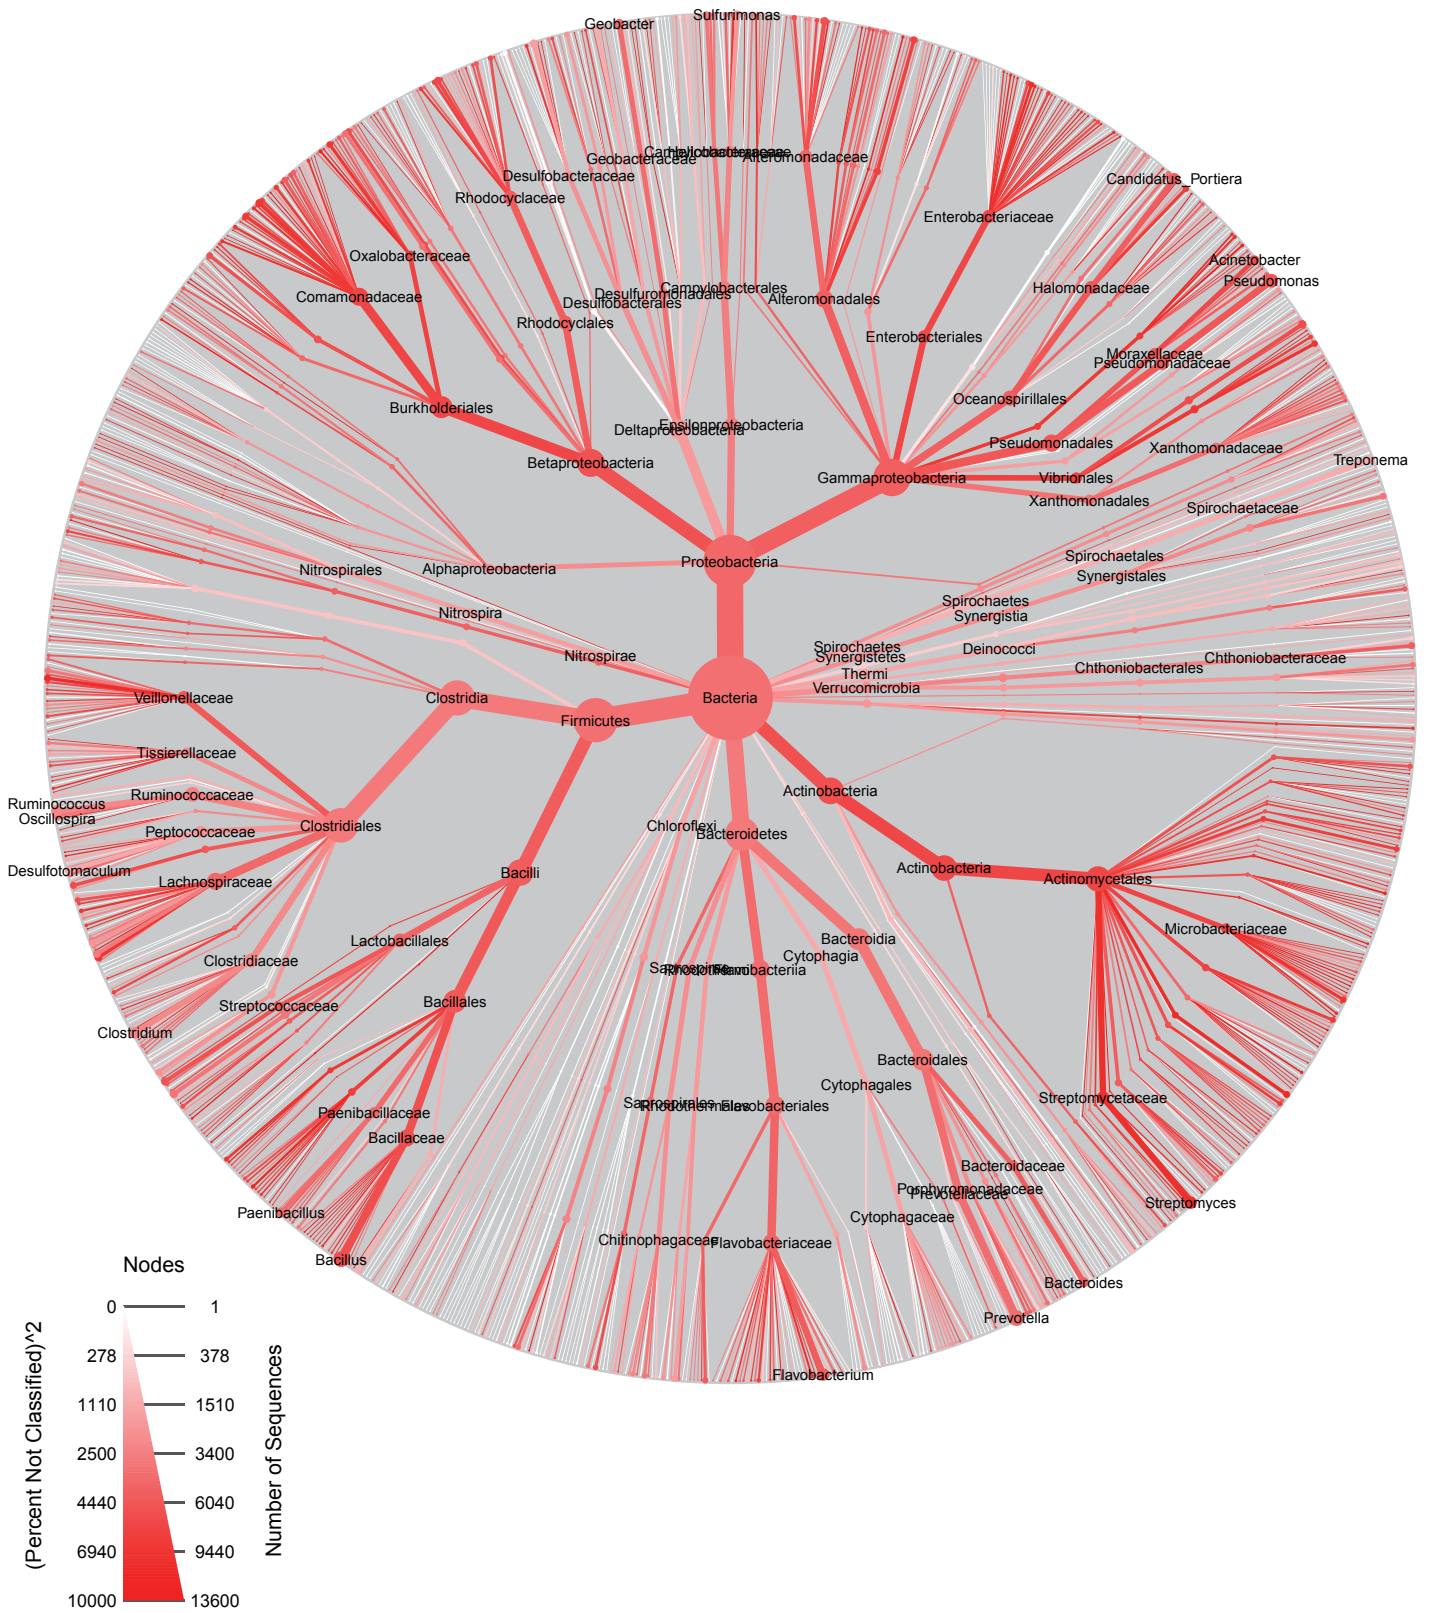



g  
V6-V9

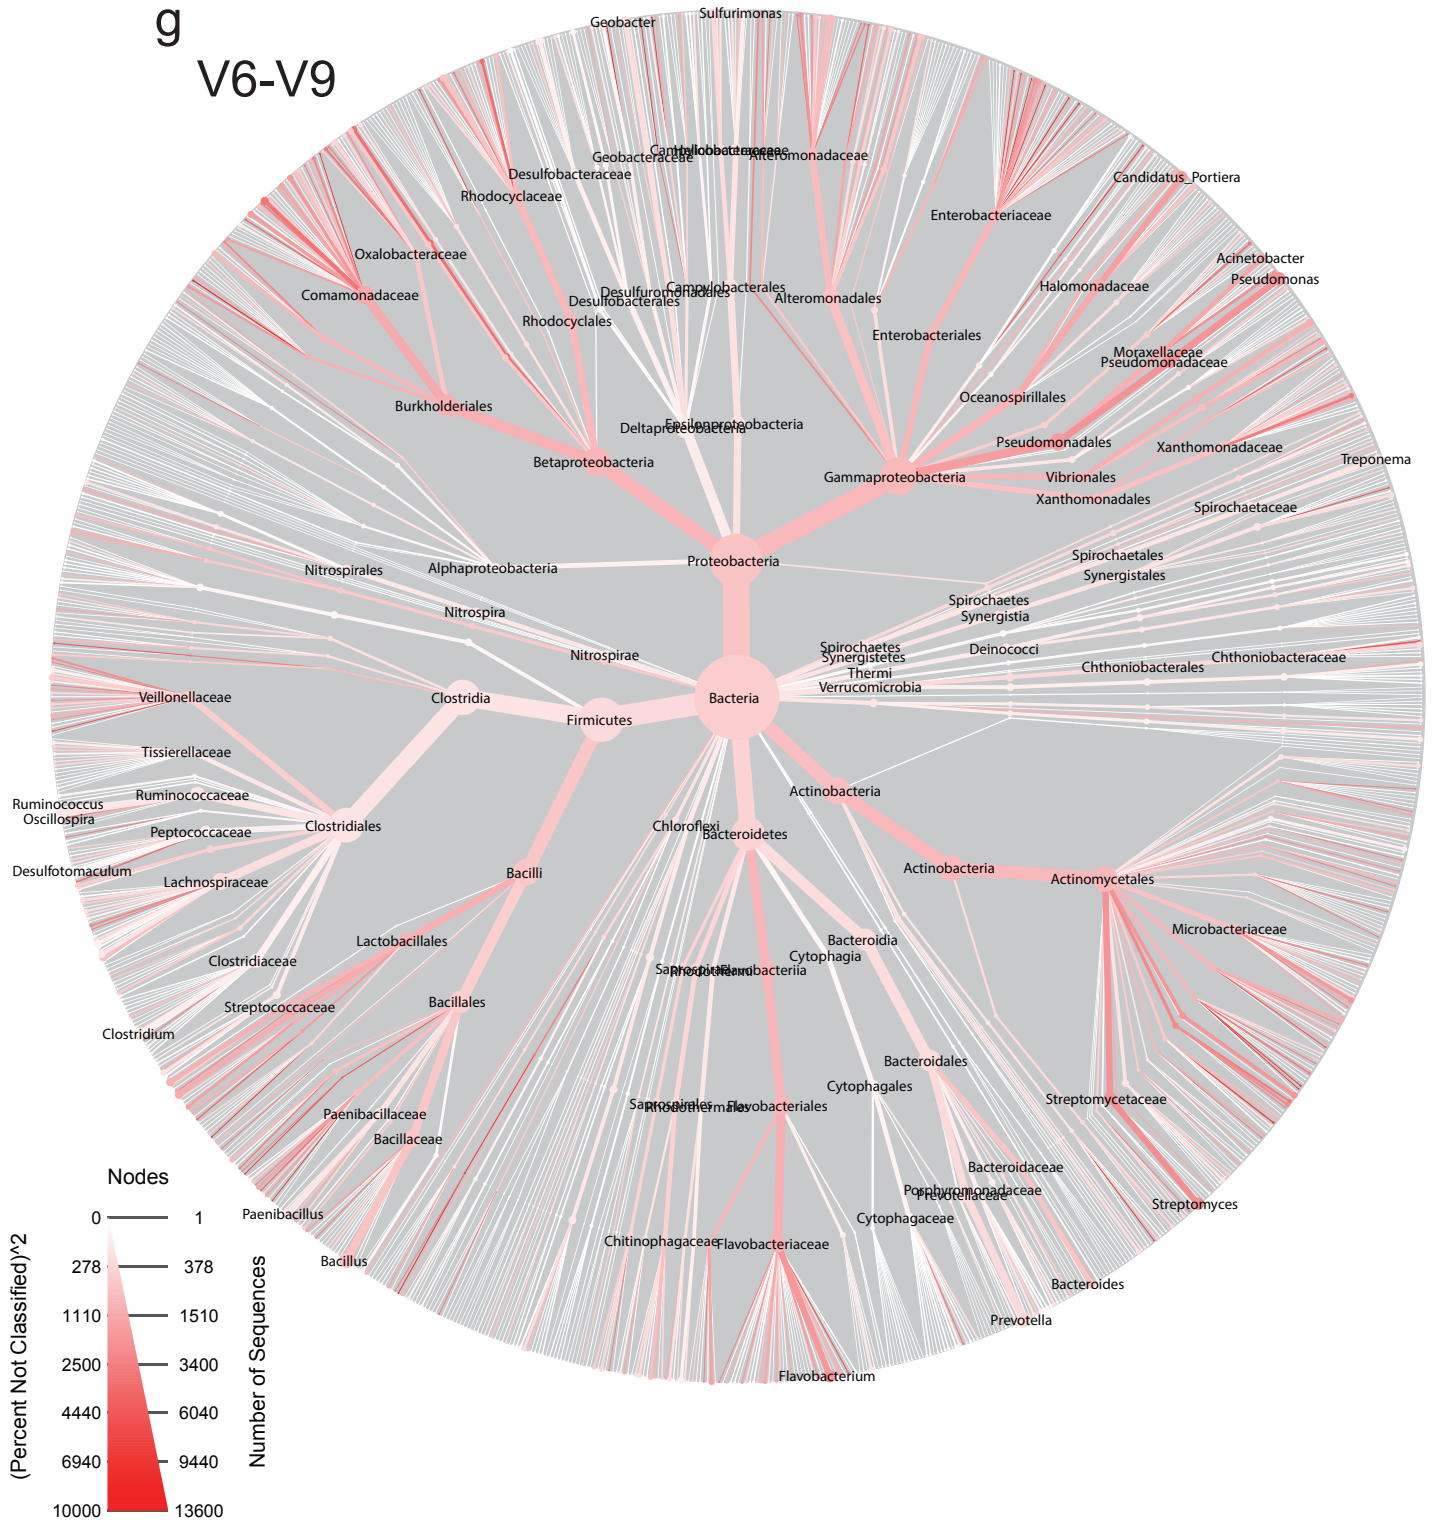

**Supplementary Figure 2:** Abundance and taxonomy of sequences used for *in silico* analysis. a) Phylogeny of all sequences used in 16S *in silico* analysis, in which node size and color reflects the number of sequences present in the original database at each taxonomic level. Subsequent panels show the same tree for b) V1-V2, c) V1-V3, d) V1-V9, e) V3-V5 f) V4, and g) V6-V9 sub-regions. In panels b-g node size reflects the number of sequences present in the original database and node colour reflects the percentage of sequences that could not be classified to species level using the respective sub-region. For clarity, labels are only shown for the top 100 most abundant taxa and the percent scale has been  $\wedge 2$  transformed. Source data are provided as a Source Data file.

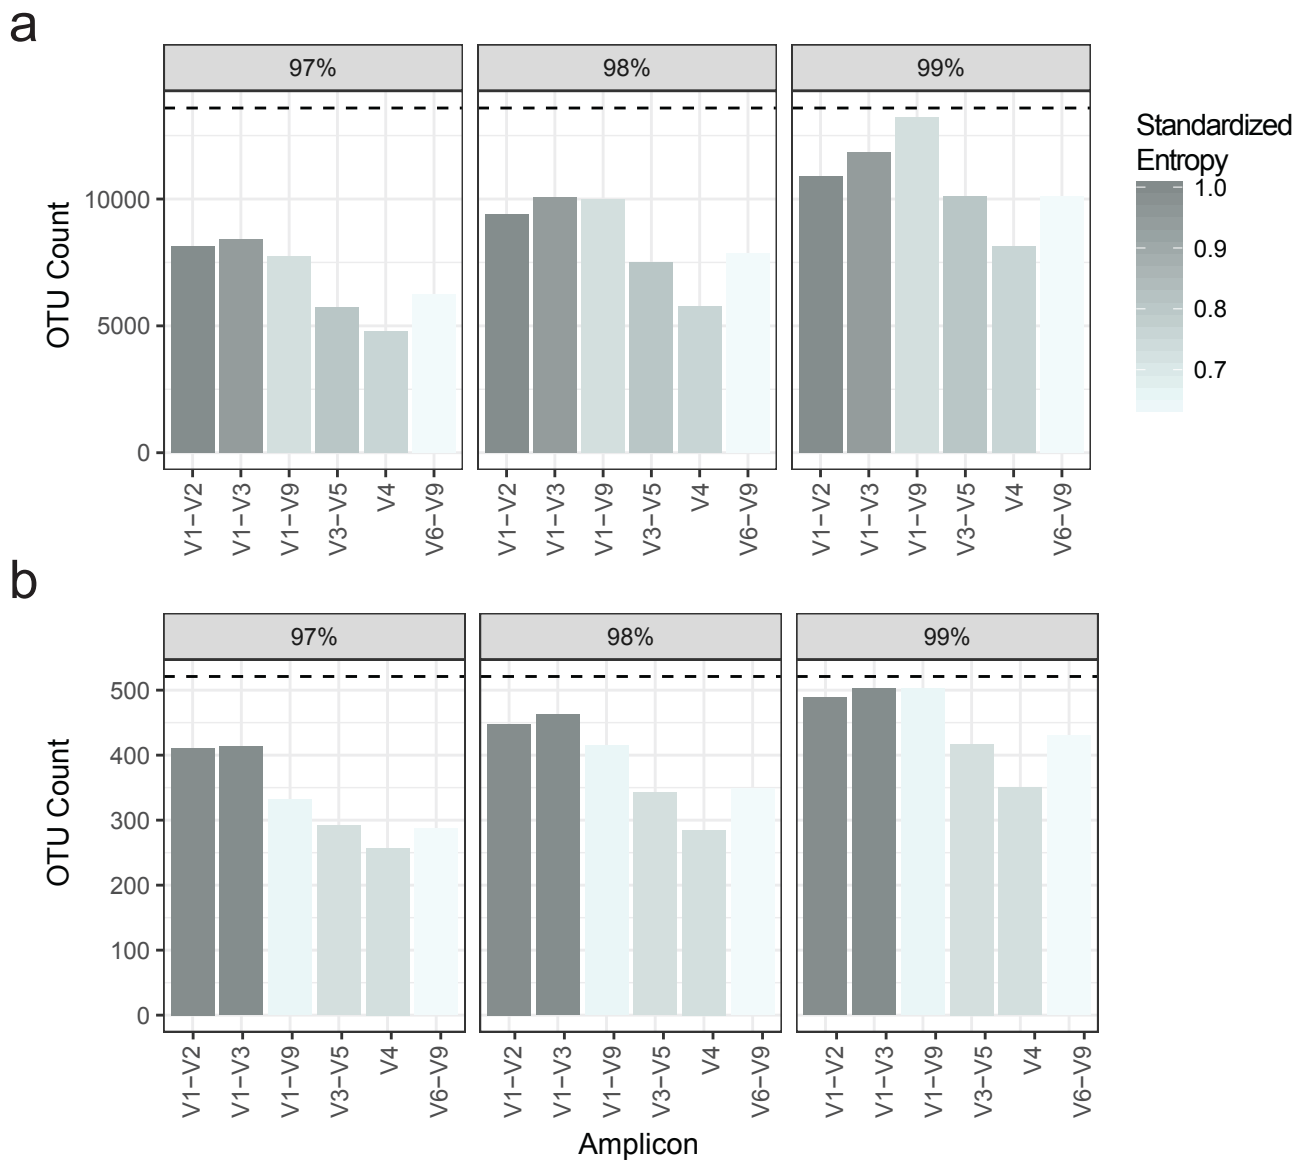

**Supplementary Figure 3:** The number of OTUs created when clustering *in silico* amplicons at different identity thresholds (97%, 98%, 99%) using USEARCH. Amplicons are generated from the a) Greengenes and b) HOMD databases. Dashed lines indicate the original number of unique sequences present in each database. Shading indicates the median per-base entropy across each variable region. Source data are provided as a Source Data file.

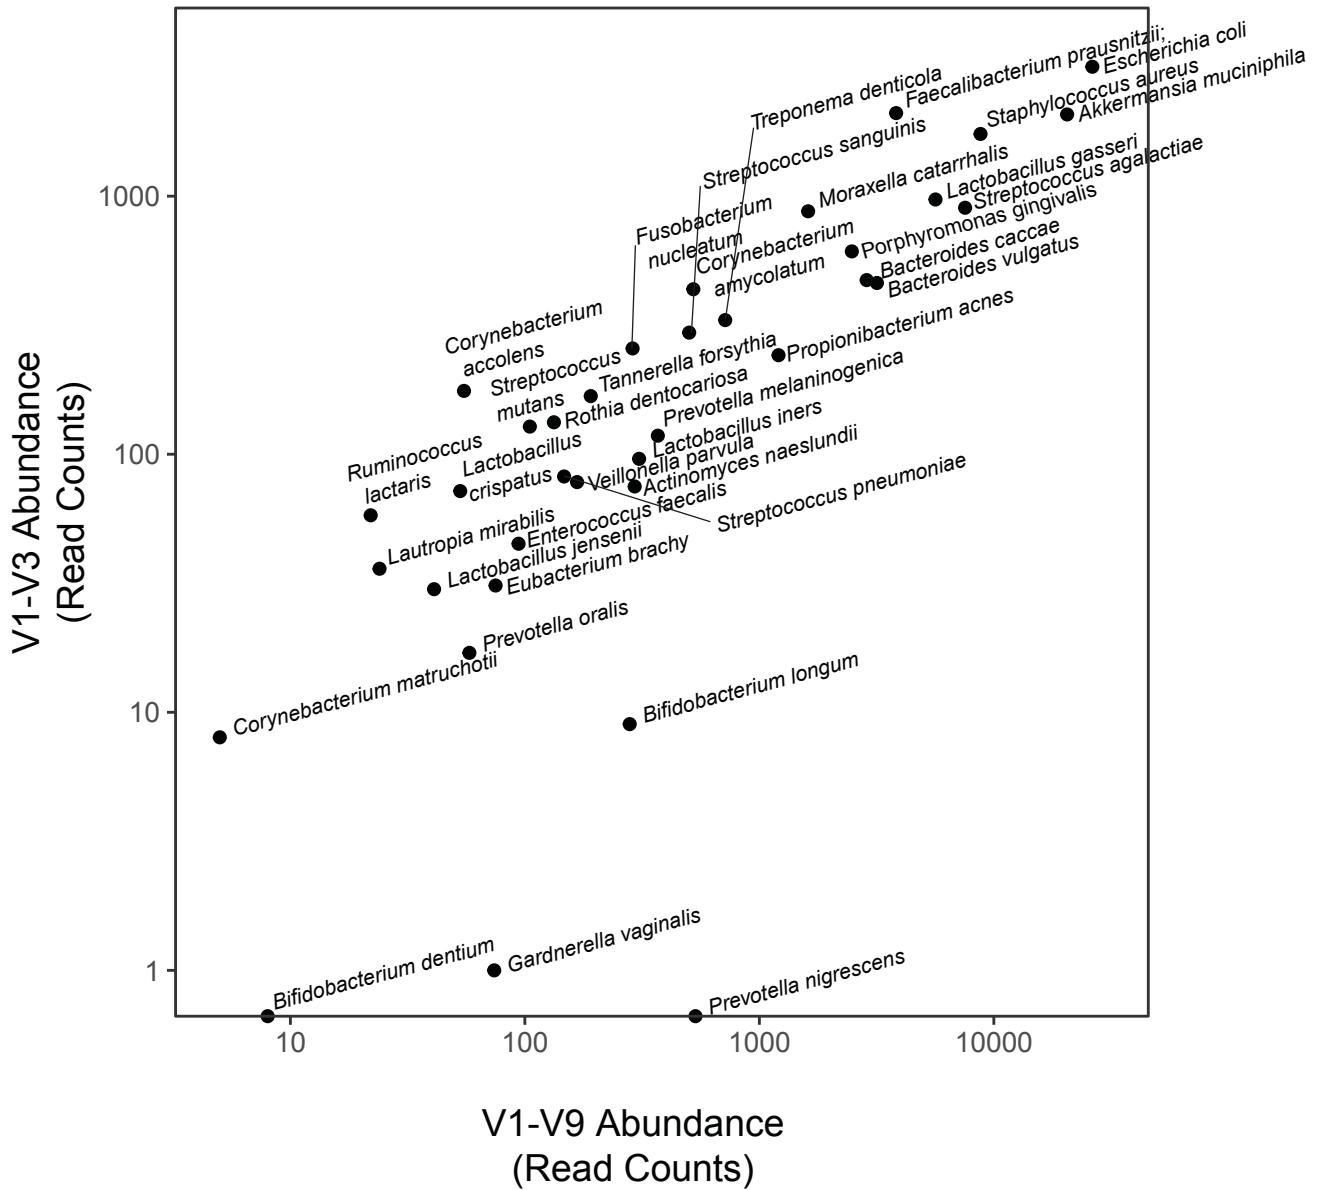

**Supplementary Figure 4:** Relative abundance of the 36 bacterial taxa present in the mock community, as estimated by sequencing of V1-V9 on the PacBio RS II platform (x axis) and sequencing of V1-V3 on the Illumina MiSeq platform (y axis). Source data are provided as a Source Data file.

a

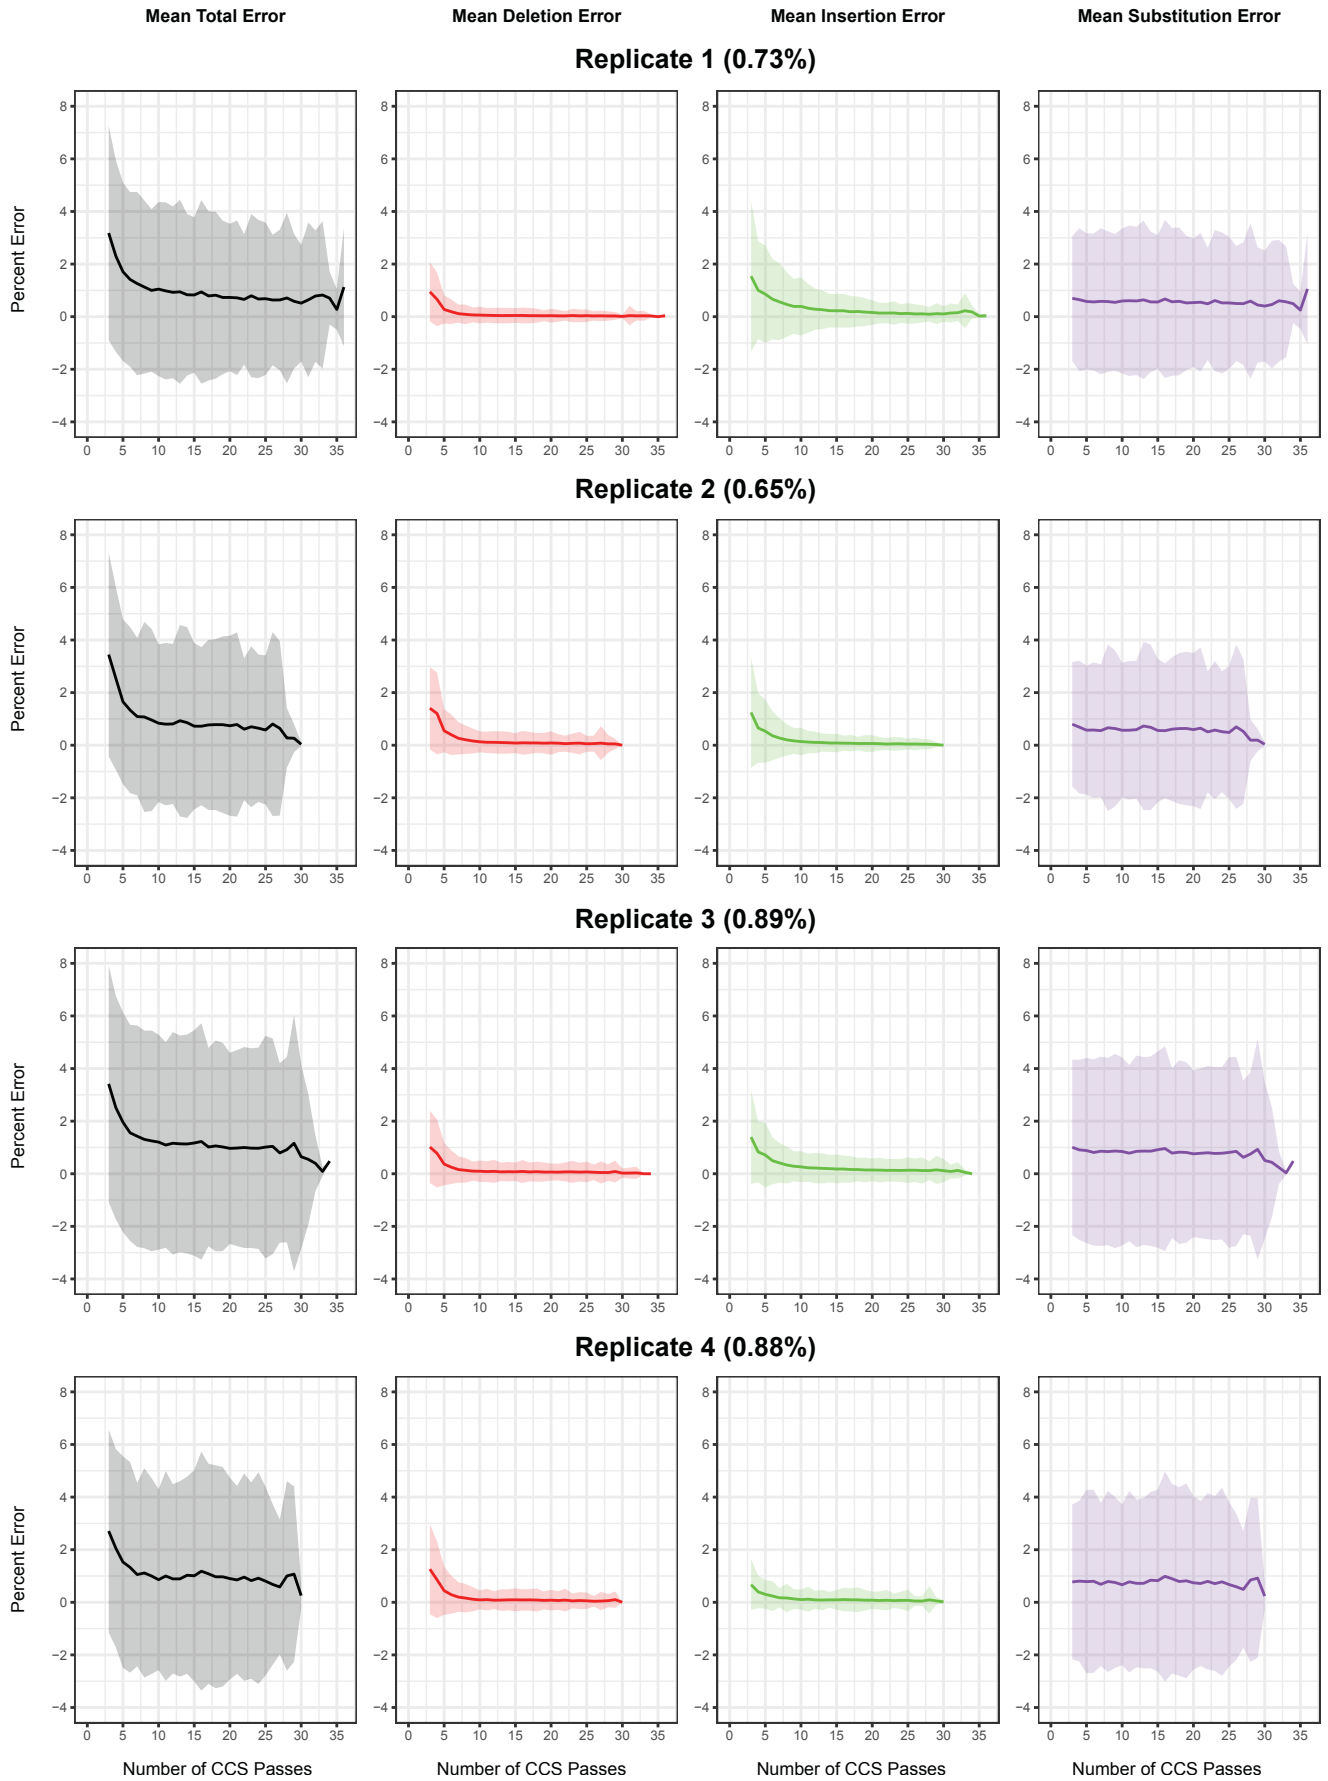

b

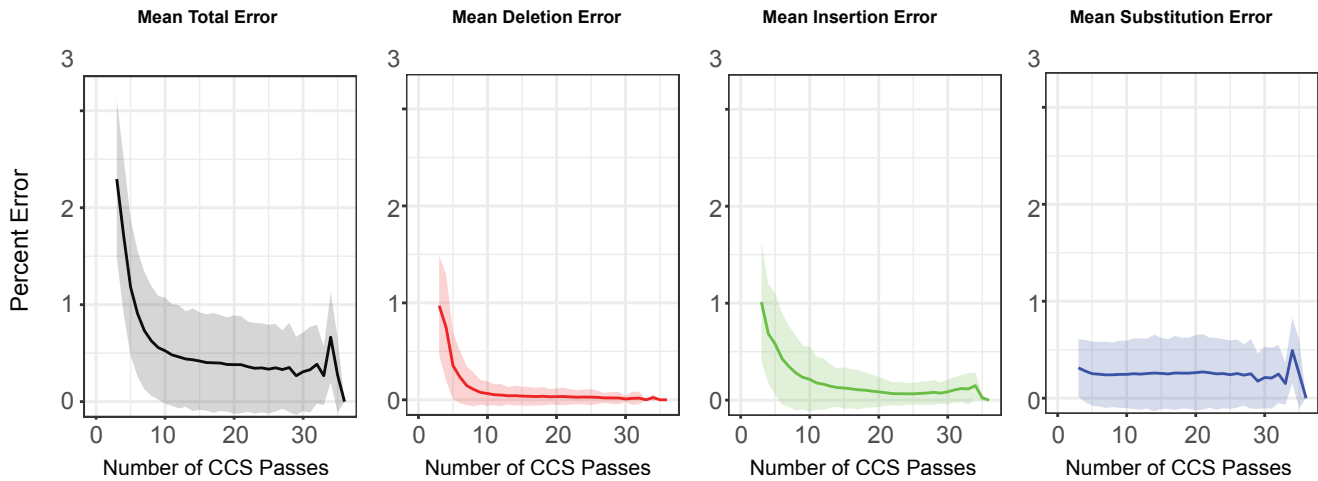

**Supplementary Figure 5:** Relationship between sequence alignment errors and number of passes used to generate PacBio CCS reads. Sequencing was performed on a PacBio RSII using P6C4v2 chemistry and CCS reads were processed using CCS2 v3.0.1. Errors were calculated by aligning V1-V9 amplicon sequences from the mock community to a reference database containing a single representative 16S sequence for each taxon. Shaded regions represent 2 standard deviations from the mean. Panel a) shows individual plots for four replicates of the mock community (numbers in parentheses indicate estimates of the minimum achievable total error). Replicate 1: n=30245, Replicate 2: n=19310, Replicate 3: n=24773, Replicate 4: n=14813. Panel b) shows summary plots for the combined sequence data from all four replicate runs. Source data are provided as a Source Data file.

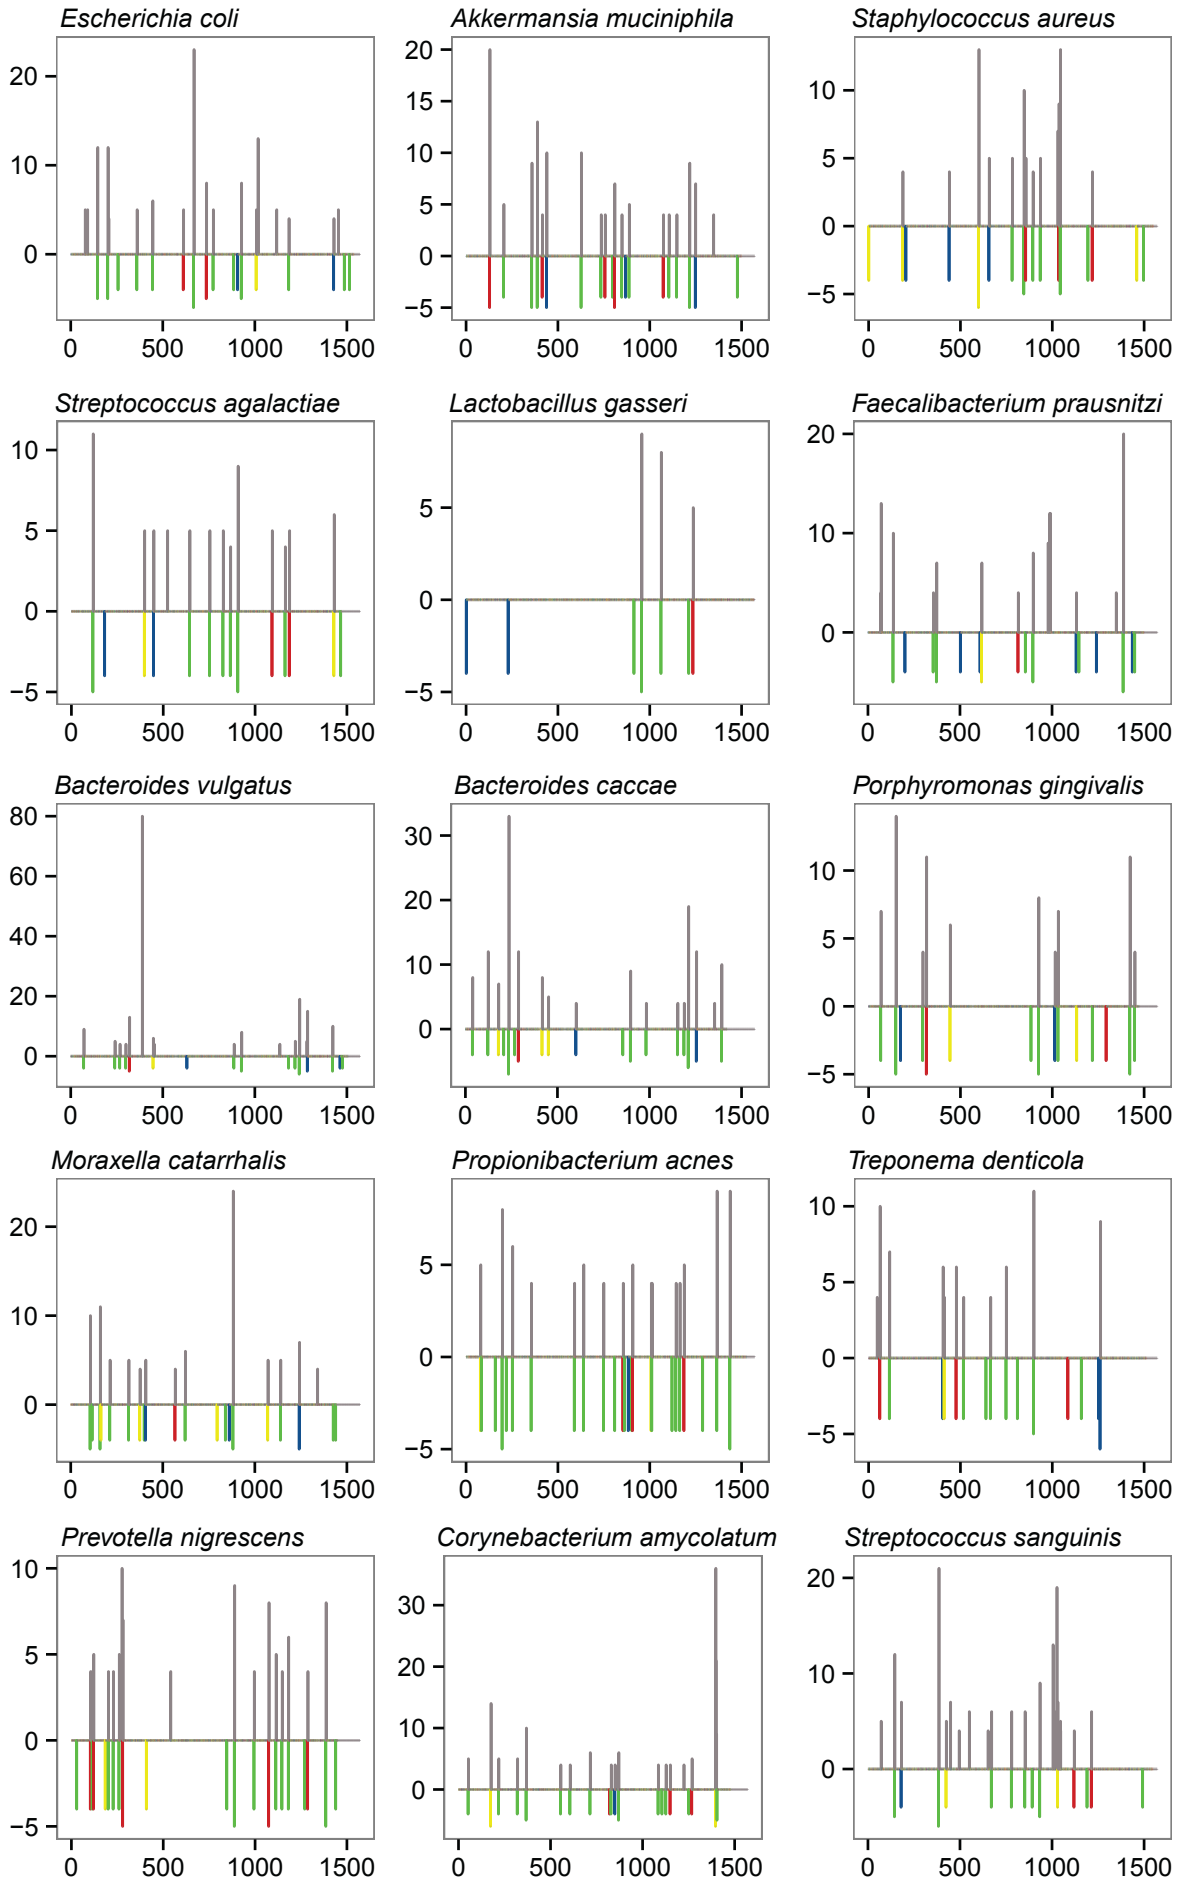

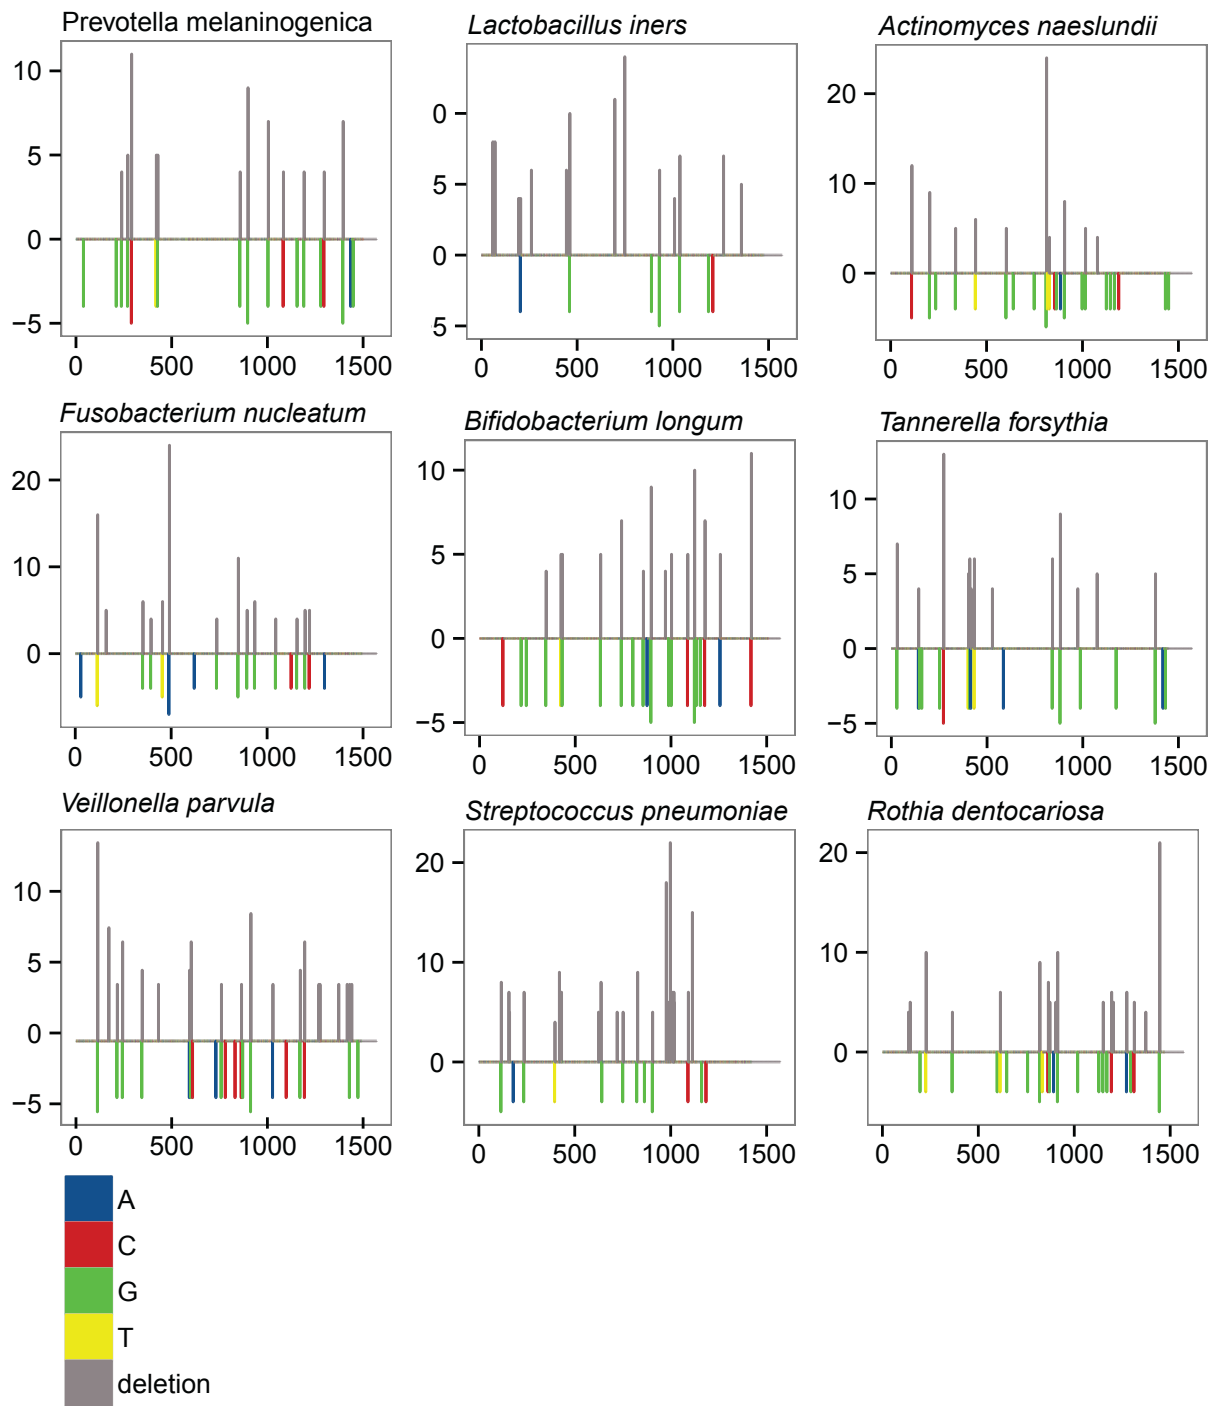

**Supplementary Figure 6:** Coincidence of deletion errors in PacBio CCS alignments with homopolymer runs. For each plot, the upper panel depicts the percent deletions occurring within aligned sequences at each based position along the reference 16S rRNA gene sequence. The lower inverted panel depicts the location and size of homopolymers within the reference sequence (only homopolymers greater than four bases in length are shown). Plots are shown for mock community taxa with more than 100 aligned CCS reads (Supplementary Figure 4). Source data are provided as a Source Data file.

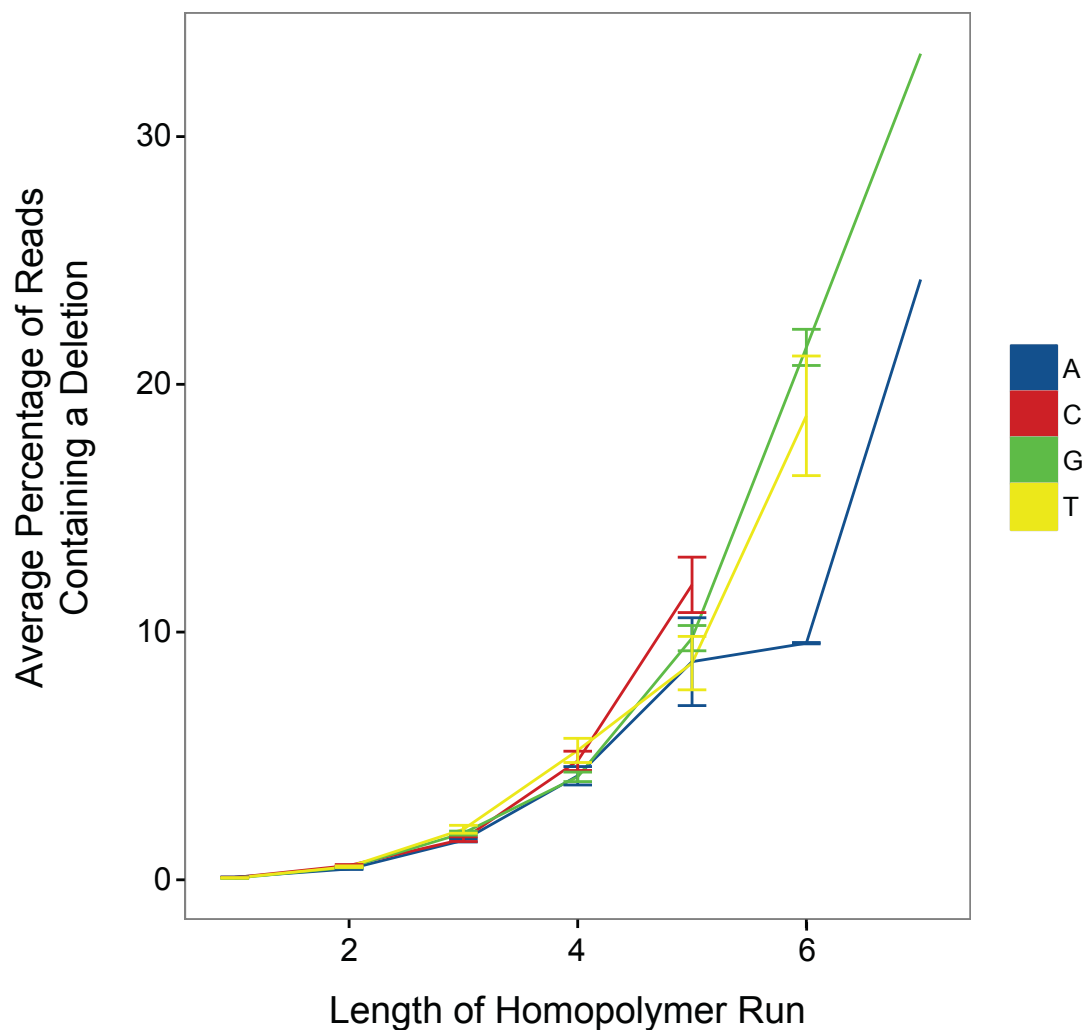

| Length of Homopolymer Run | Number of Occurrences |      |      |      |
|---------------------------|-----------------------|------|------|------|
|                           | A                     | C    | G    | T    |
| 1                         | 6560                  | 7177 | 7880 | 6963 |
| 2                         | 2312                  | 1638 | 2634 | 1607 |
| 3                         | 595                   | 441  | 705  | 262  |
| 4                         | 64                    | 77   | 299  | 58   |
| 5                         | 11                    | 14   | 80   | 6    |
| 6                         | 2                     | 0    | 7    | 9    |
| 7                         | 1                     | 0    | 1    | 0    |

| Length of Homopolymer Run | Number of Reads |          |          |          |
|---------------------------|-----------------|----------|----------|----------|
|                           | A               | C        | G        | T        |
| 1                         | 16034166        | 17441613 | 19332347 | 16750088 |
| 2                         | 5934672         | 4084385  | 6316552  | 3795109  |
| 3                         | 1524410         | 1013143  | 1553297  | 610713   |
| 4                         | 168075          | 153837   | 616268   | 95445    |
| 5                         | 48080           | 76051    | 239618   | 4096     |
| 6                         | 710             | 0        | 35799    | 9807     |
| 7                         | 260             | 0        | 2714     | 0        |

**Supplementary Figure 7:** Relationship between frequency of deletion errors in PacBio CCS alignments and the length of coincident homopolymer runs in the reference sequence. Sequence data were generated from the microbial mock community and aligned to a database containing single representative 16S rRNA gene sequence for each taxon. Lower left table shows the number of homopolymer runs present in reference sequences. Lower right table shows the number of reads covering each type of homopolymer run. Source data are provided as a Source Data file.



*Escherichia coli*

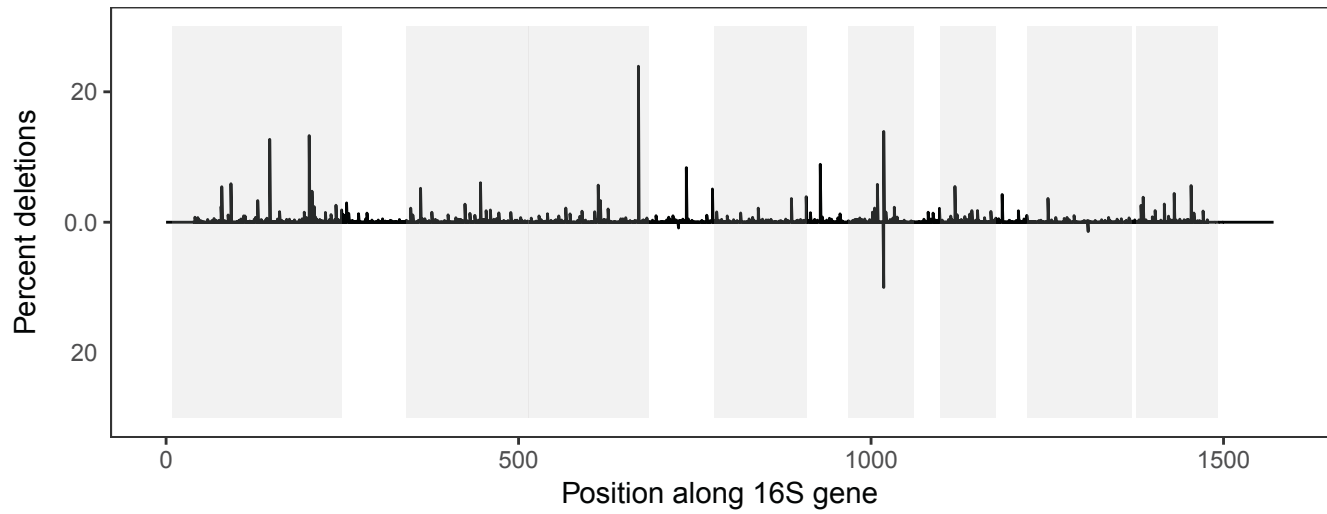

**Supplementary Figure 8:** Location of deletion errors observed in PacBio CCS reads (upper panel) and Illumina MiSeq reads (lower, inverted panel) aligned to a single *E. coli* 16S rRNA gene reference sequence. Sequence data were generated from the bacterial mock community. Source data are provided as a Source Data file.

### Replicate 1 (8764 sequences aligned)

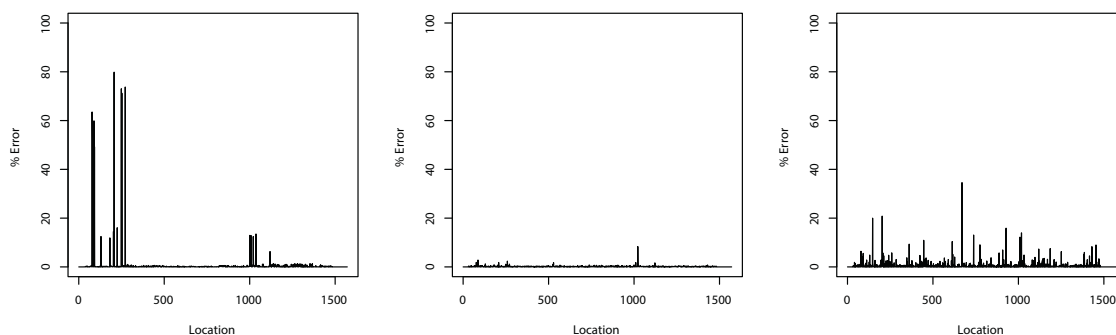

### Replicate 2 (5721 sequences aligned)

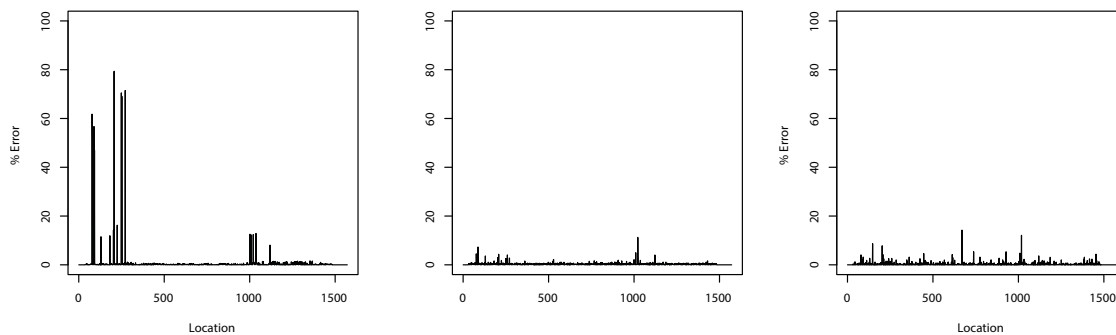

### Replicate 3 (7362 sequences aligned)

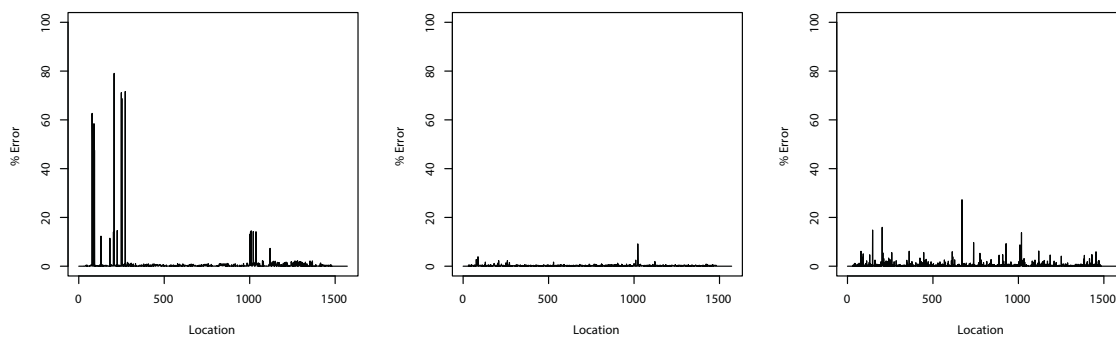

### Replicate 4 (4477 sequences aligned)

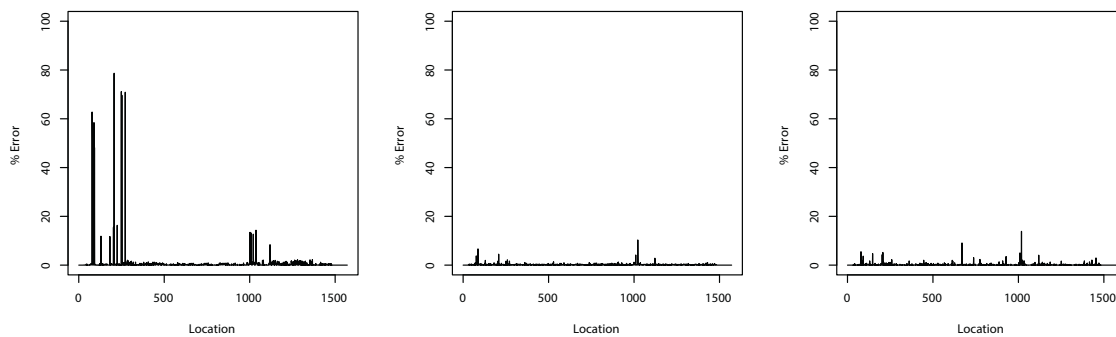

**Supplementary Figure 9:** Substitution, insertion, and deletion errors in sequences aligned to a single reference 16S gene sequence for *E. coli* str. K-12 MG1655. Plots are shown separately for each of the four replicate samples of the 36 species mock community. Source data are provided as Source Data file.

**Escherichia coli str. K-12 substr. MG1655**  
(25676 sequences aligned)

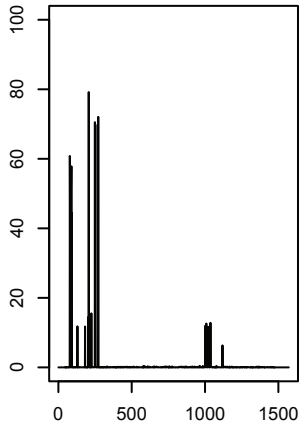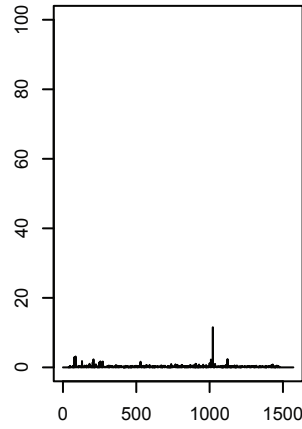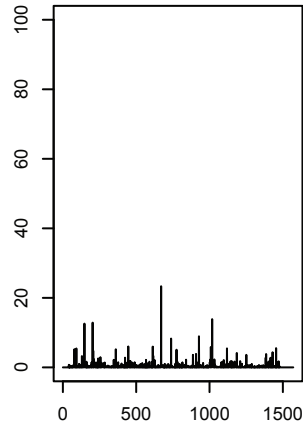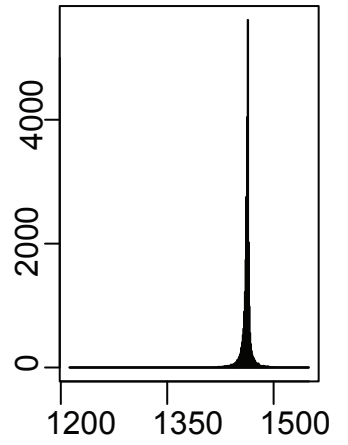

**Akkermansia muciniphila ATCC BAA-835**  
(20238 sequences aligned)

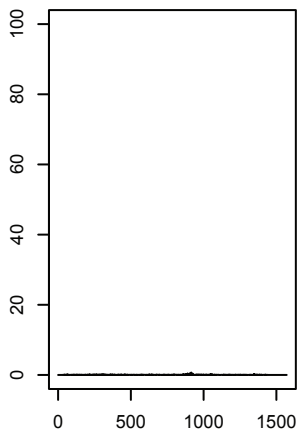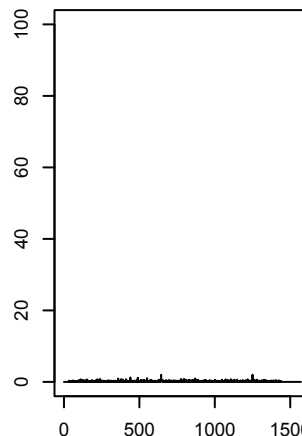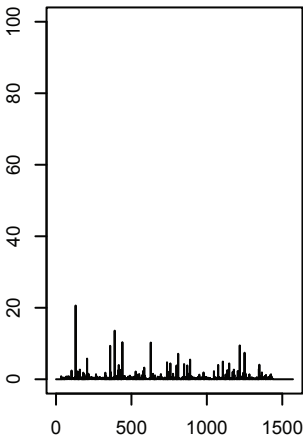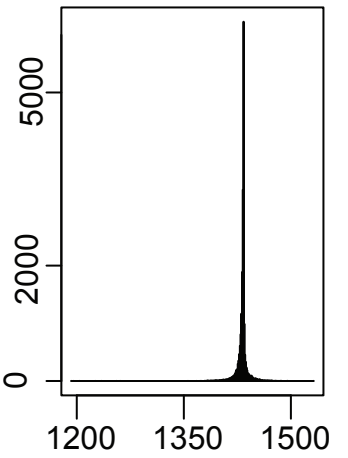

**Staphylococcus aureus subsp. aureus Mu50**  
(8441 sequences aligned)

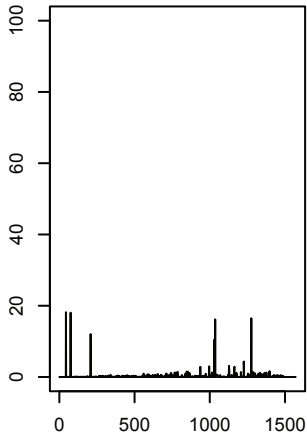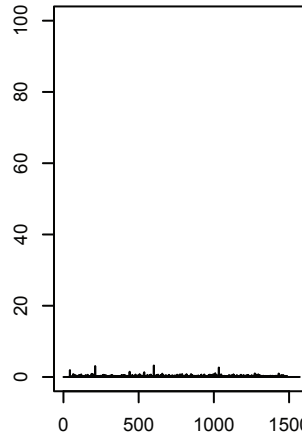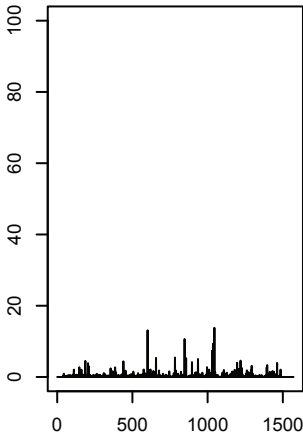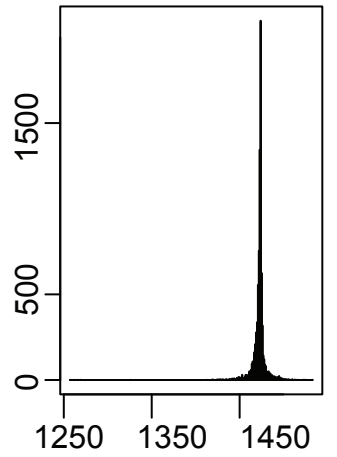

**Streptococcus agalactiae; ATCC 27956**  
(7167 sequences aligned)

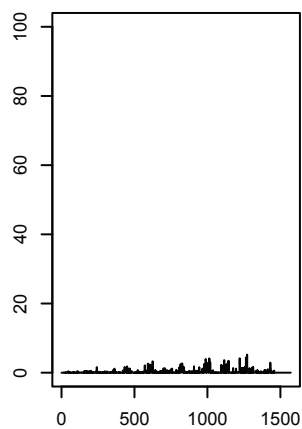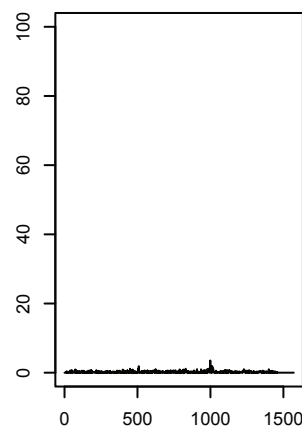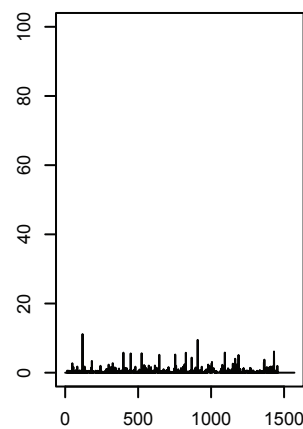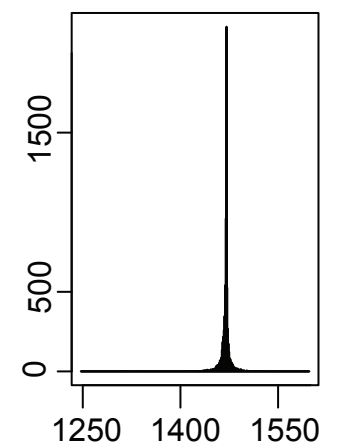

**Lactobacillus gasseri (T); ATCC 33323**  
(5451 sequences aligned)

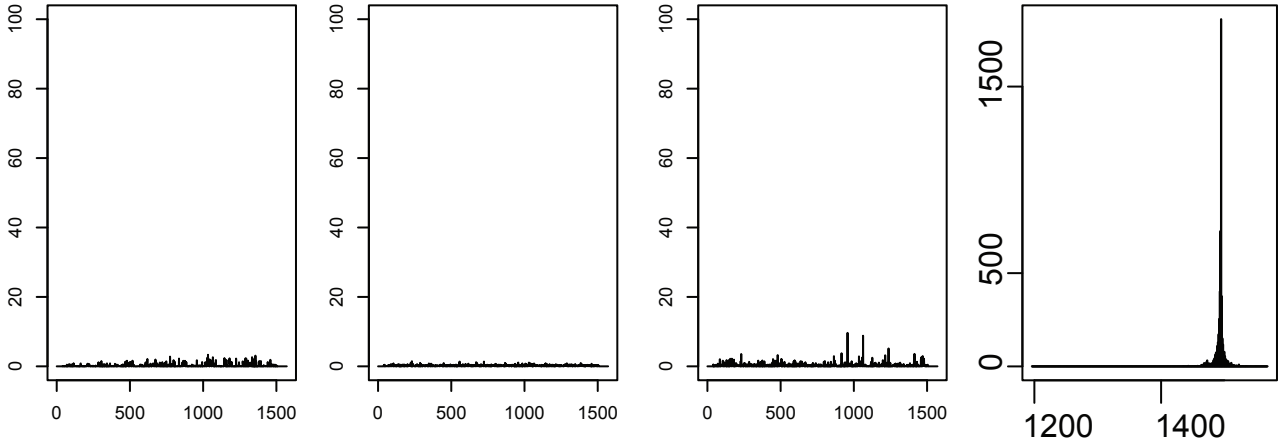

**Faecalibacterium prausnitzii; ATCC 27766**  
(3648 sequences aligned)

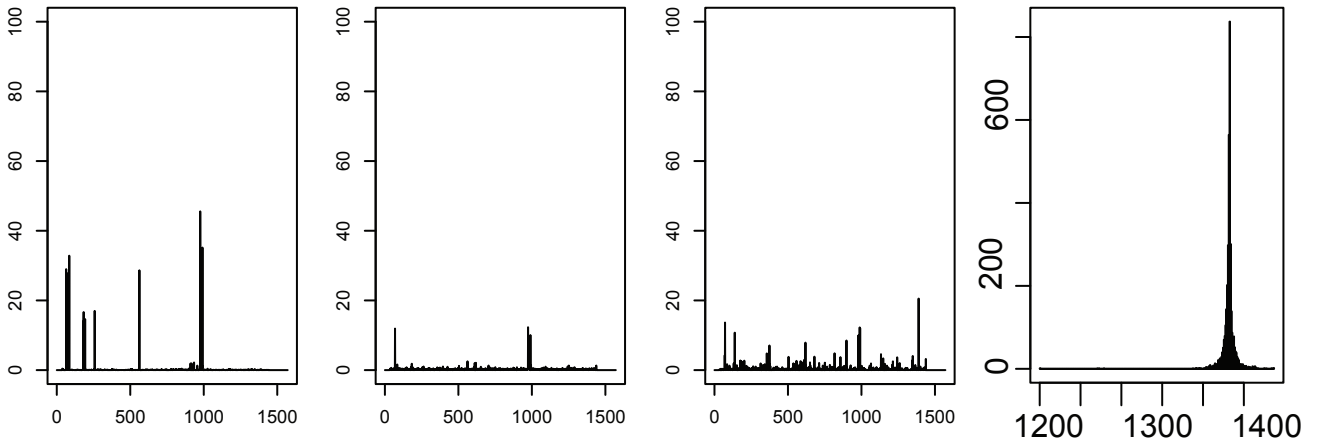

**Bacteroides vulgatus ATCC 8482**  
(2959 sequences aligned)

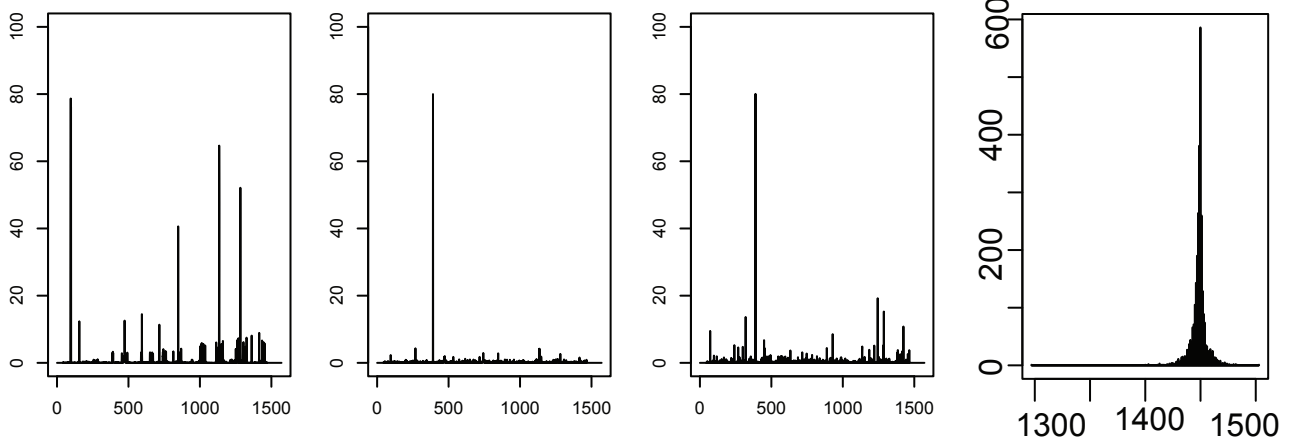

**Bacteroides caccae (T); ATCC 43185T**  
(2714 sequences aligned)

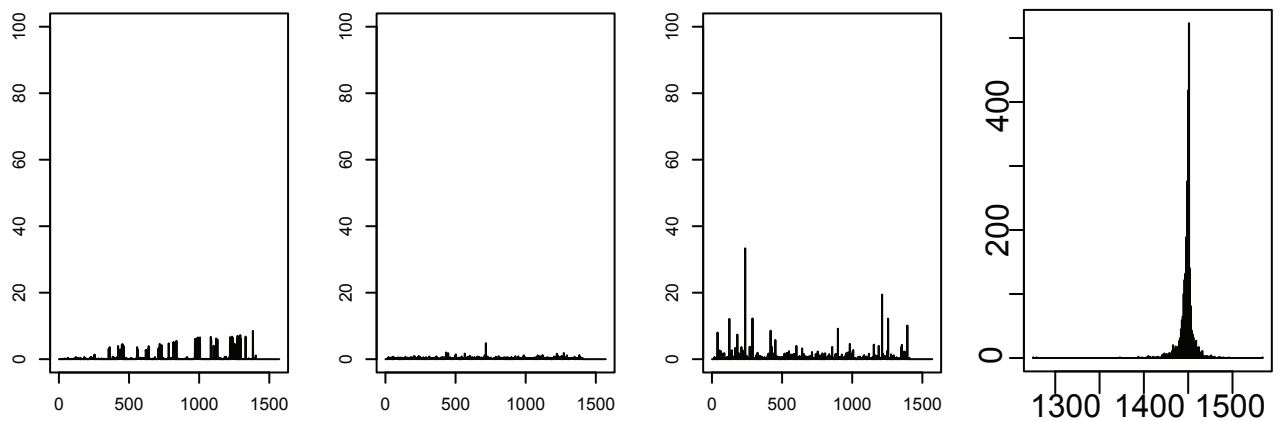

**Porphyromonas gingivalis ATCC 33277**  
(2377 sequences aligned)

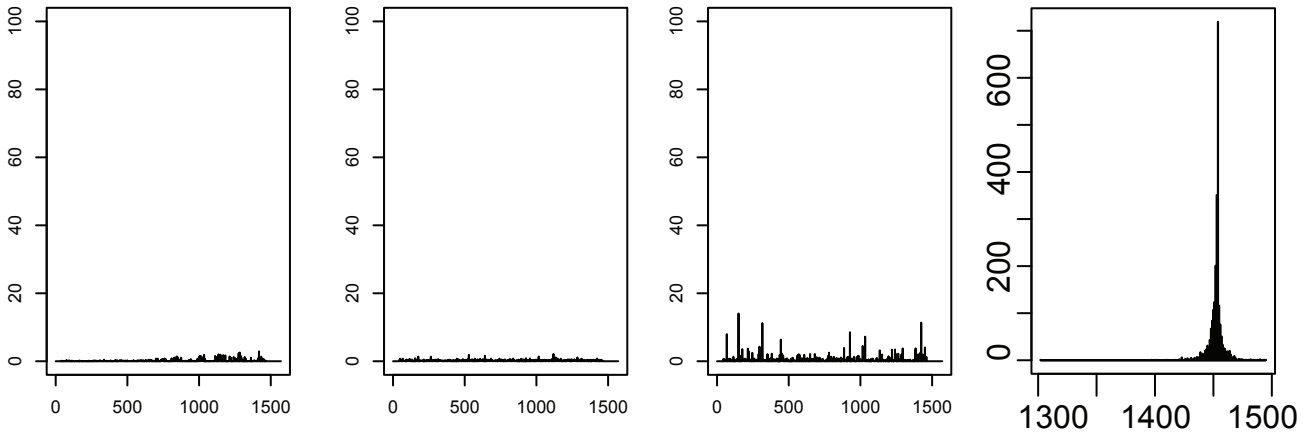

**Moraxella catarrhalis (T); ATCC 25238T; AF005185**  
(1549 sequences aligned)

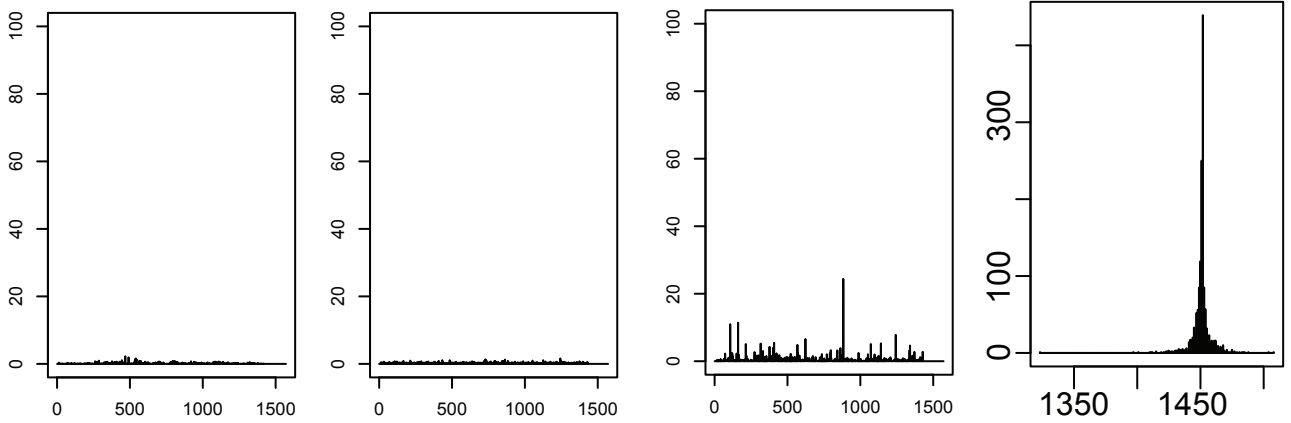

**Propionibacterium acnes ATCC 11828**  
(1126 sequences aligned)

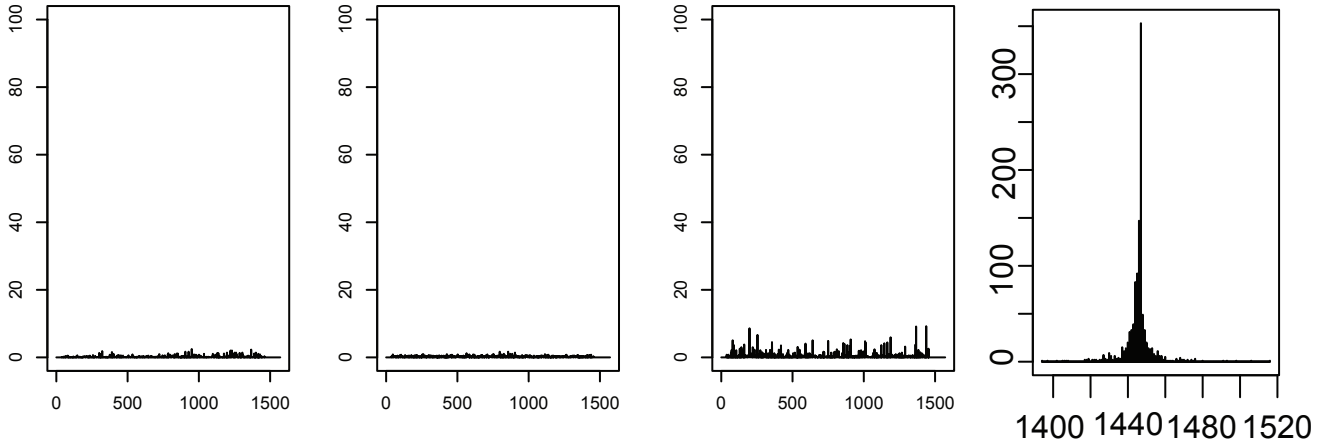

**Treponema denticola ATCC 35405**  
(689 sequences aligned)

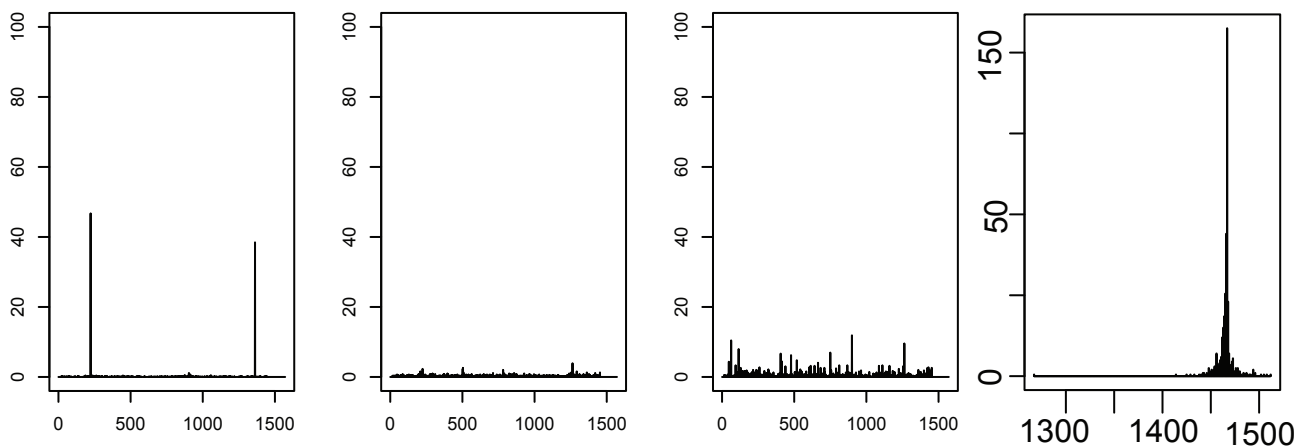

**Prevotella nigrescens (T); NCTC 9336; X73963  
(487 sequences aligned)**

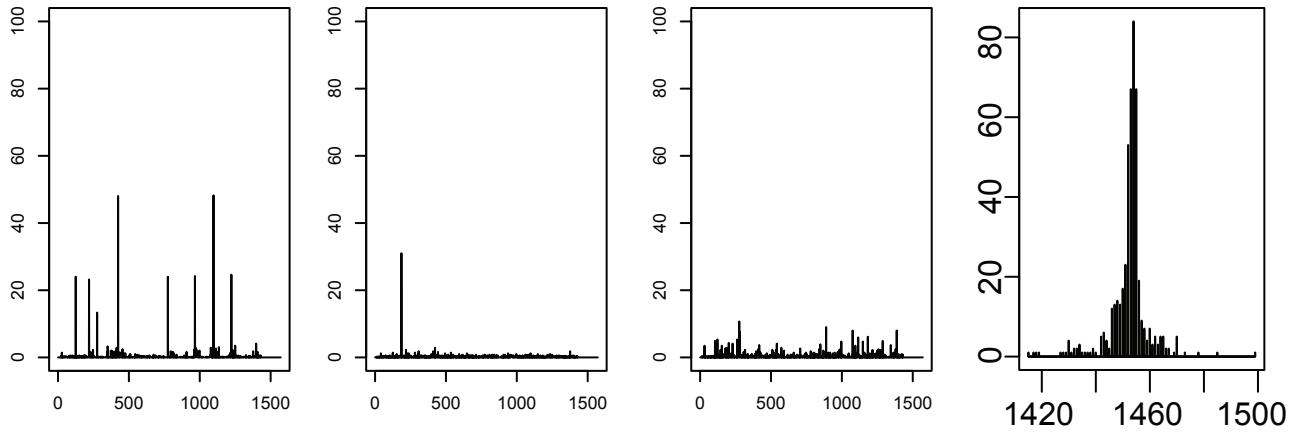

**Corynebacterium amycolatum; NCFB 2768; X84244  
(465 sequences aligned)**

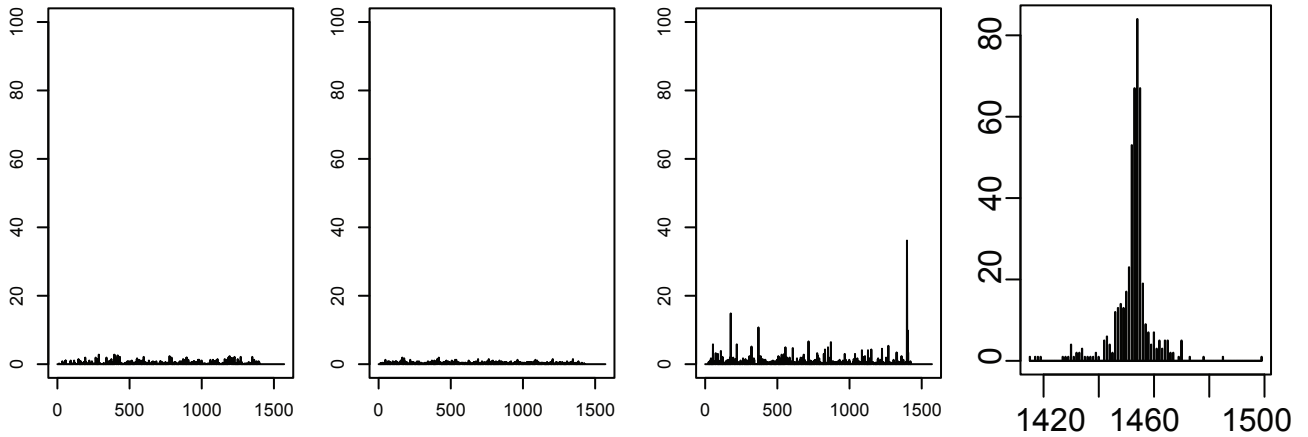

**Streptococcus sanguinis SK36  
(430 sequences aligned)**

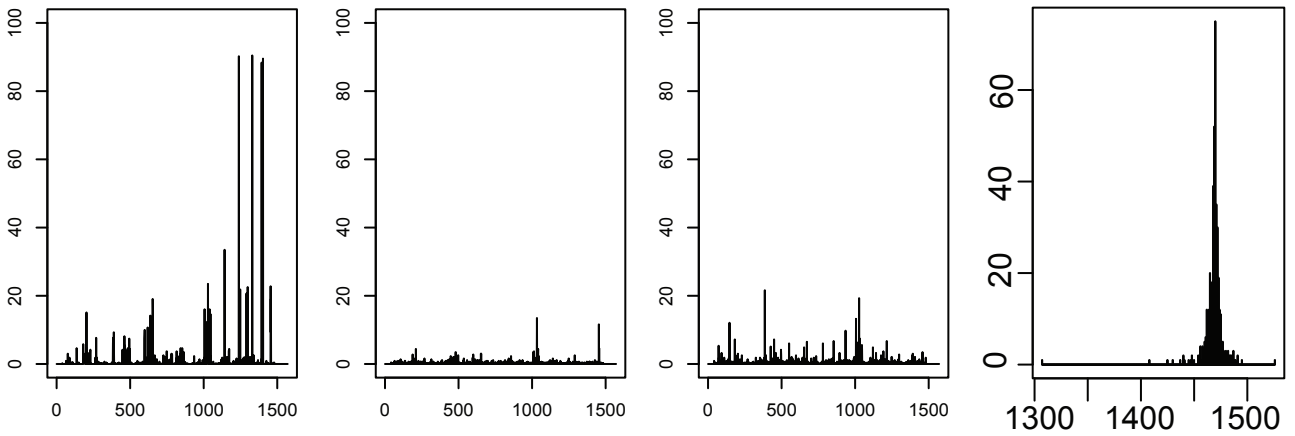

**Prevotella melaninogenica; ATCC 25845  
(327 sequences aligned)**

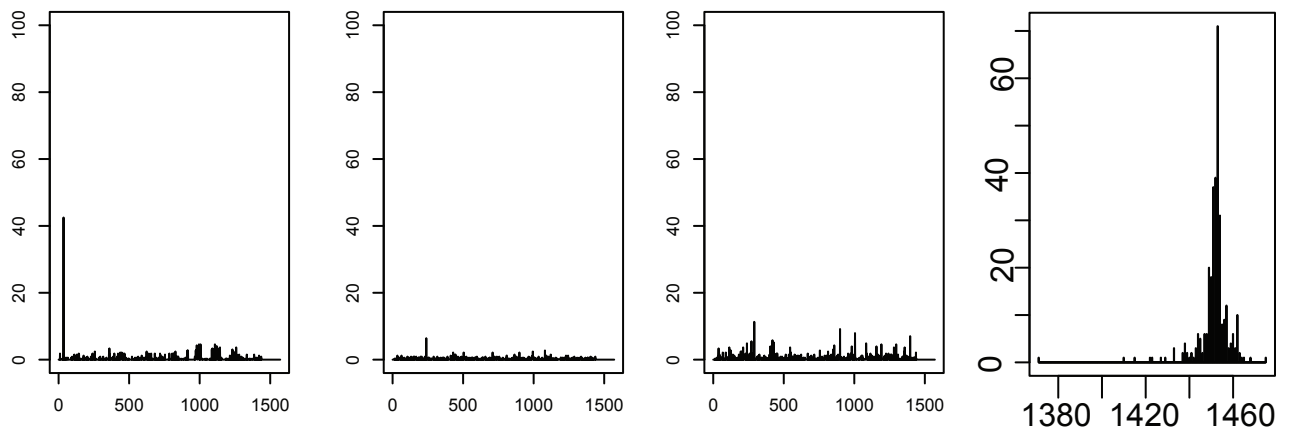

**Lactobacillus iners; VA15\_2004; AY526083**  
(292 sequences aligned)

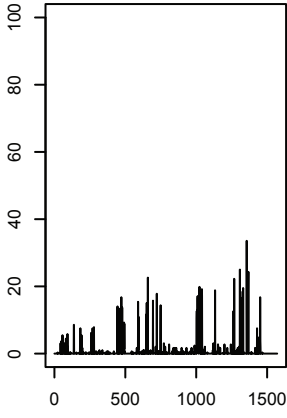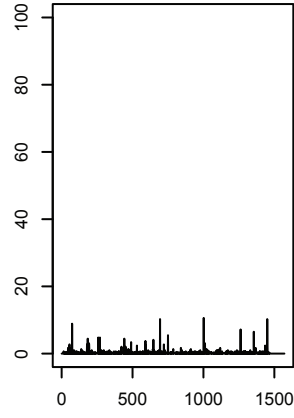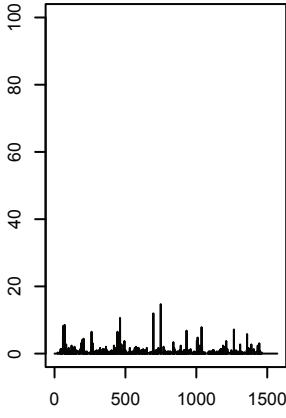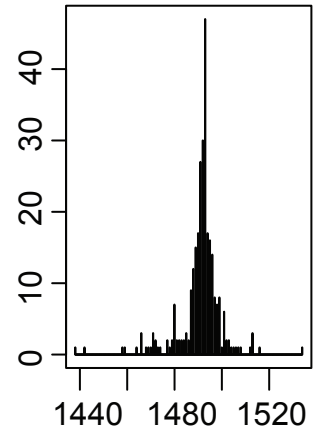

**Actinomyces naeslundii; CCUG 33519**  
(262 sequences aligned)

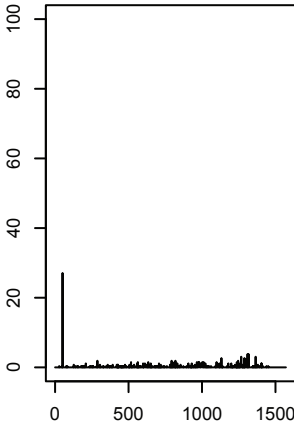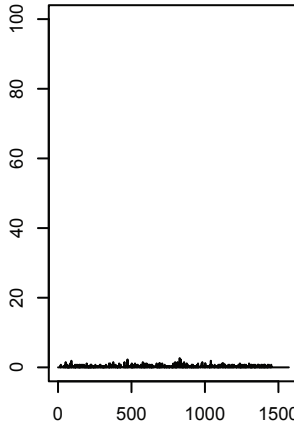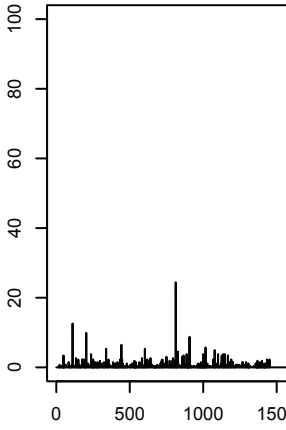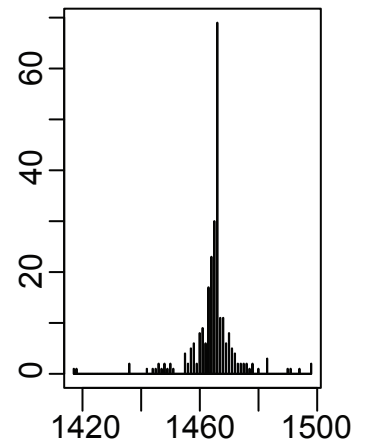

**Fusobacterium nucleatum (T); ATCC 25586**  
(260 sequences aligned)

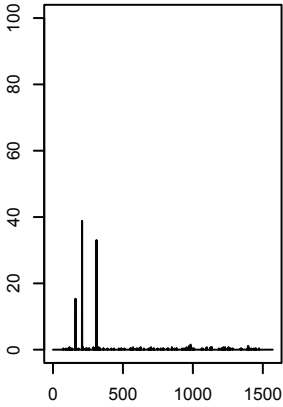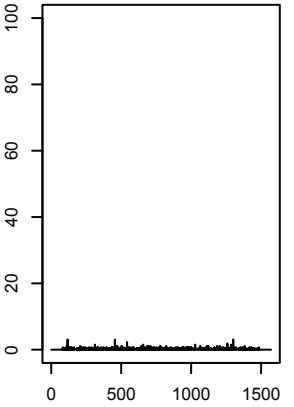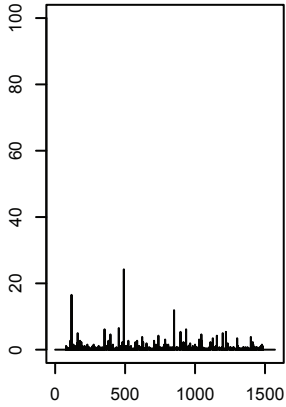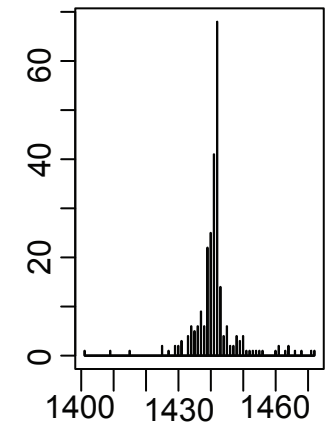

**Bifidobacterium longum (T); ATCC 15697**  
(252 sequences aligned)

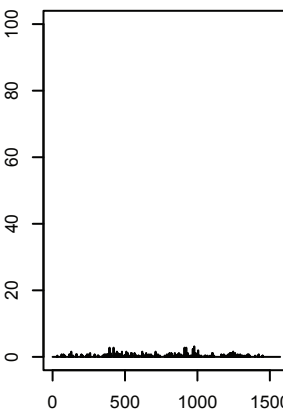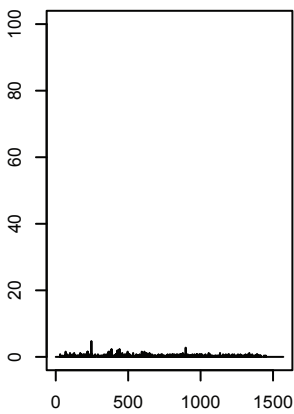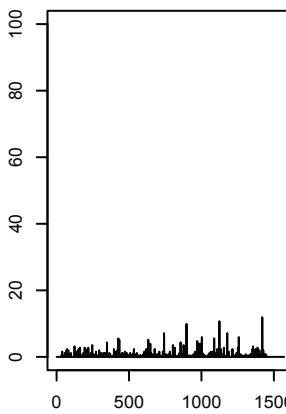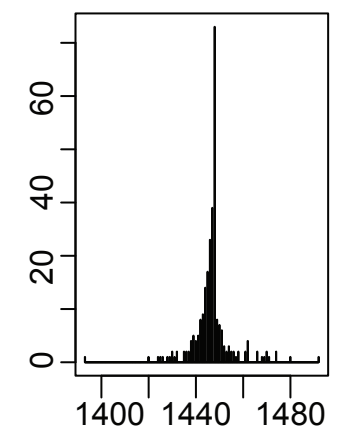

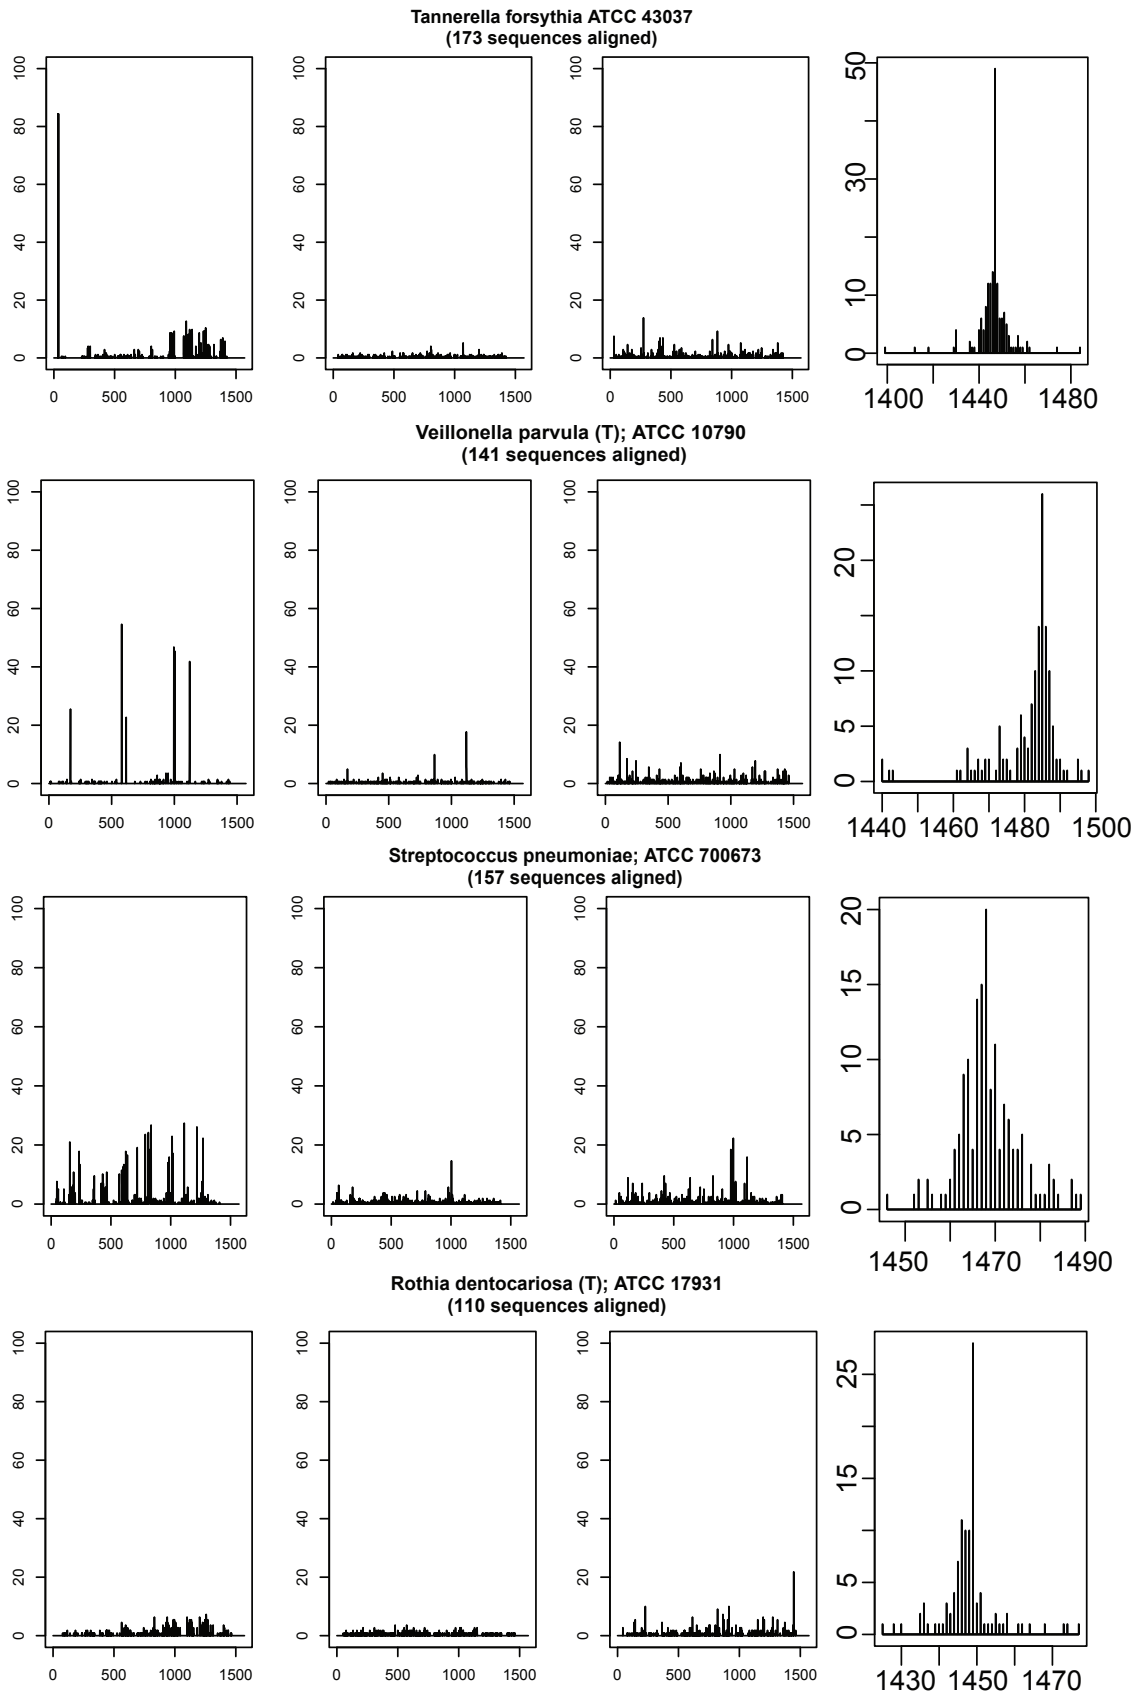

**Supplementary Figure 10** Location and frequency of alignment errors in PacBio CCS reads aligned to 16S rRNA reference gene sequences. Panels are as follows far left: substitution errors, mid-left: insertion errors, mid-right: deletion errors, far right: histogram showing distribution in length of successfully aligned regions. Sequence data were generated from the 36 taxon bacterial mock community; however, panels are only shown for taxa with >100 aligned CCS reads.



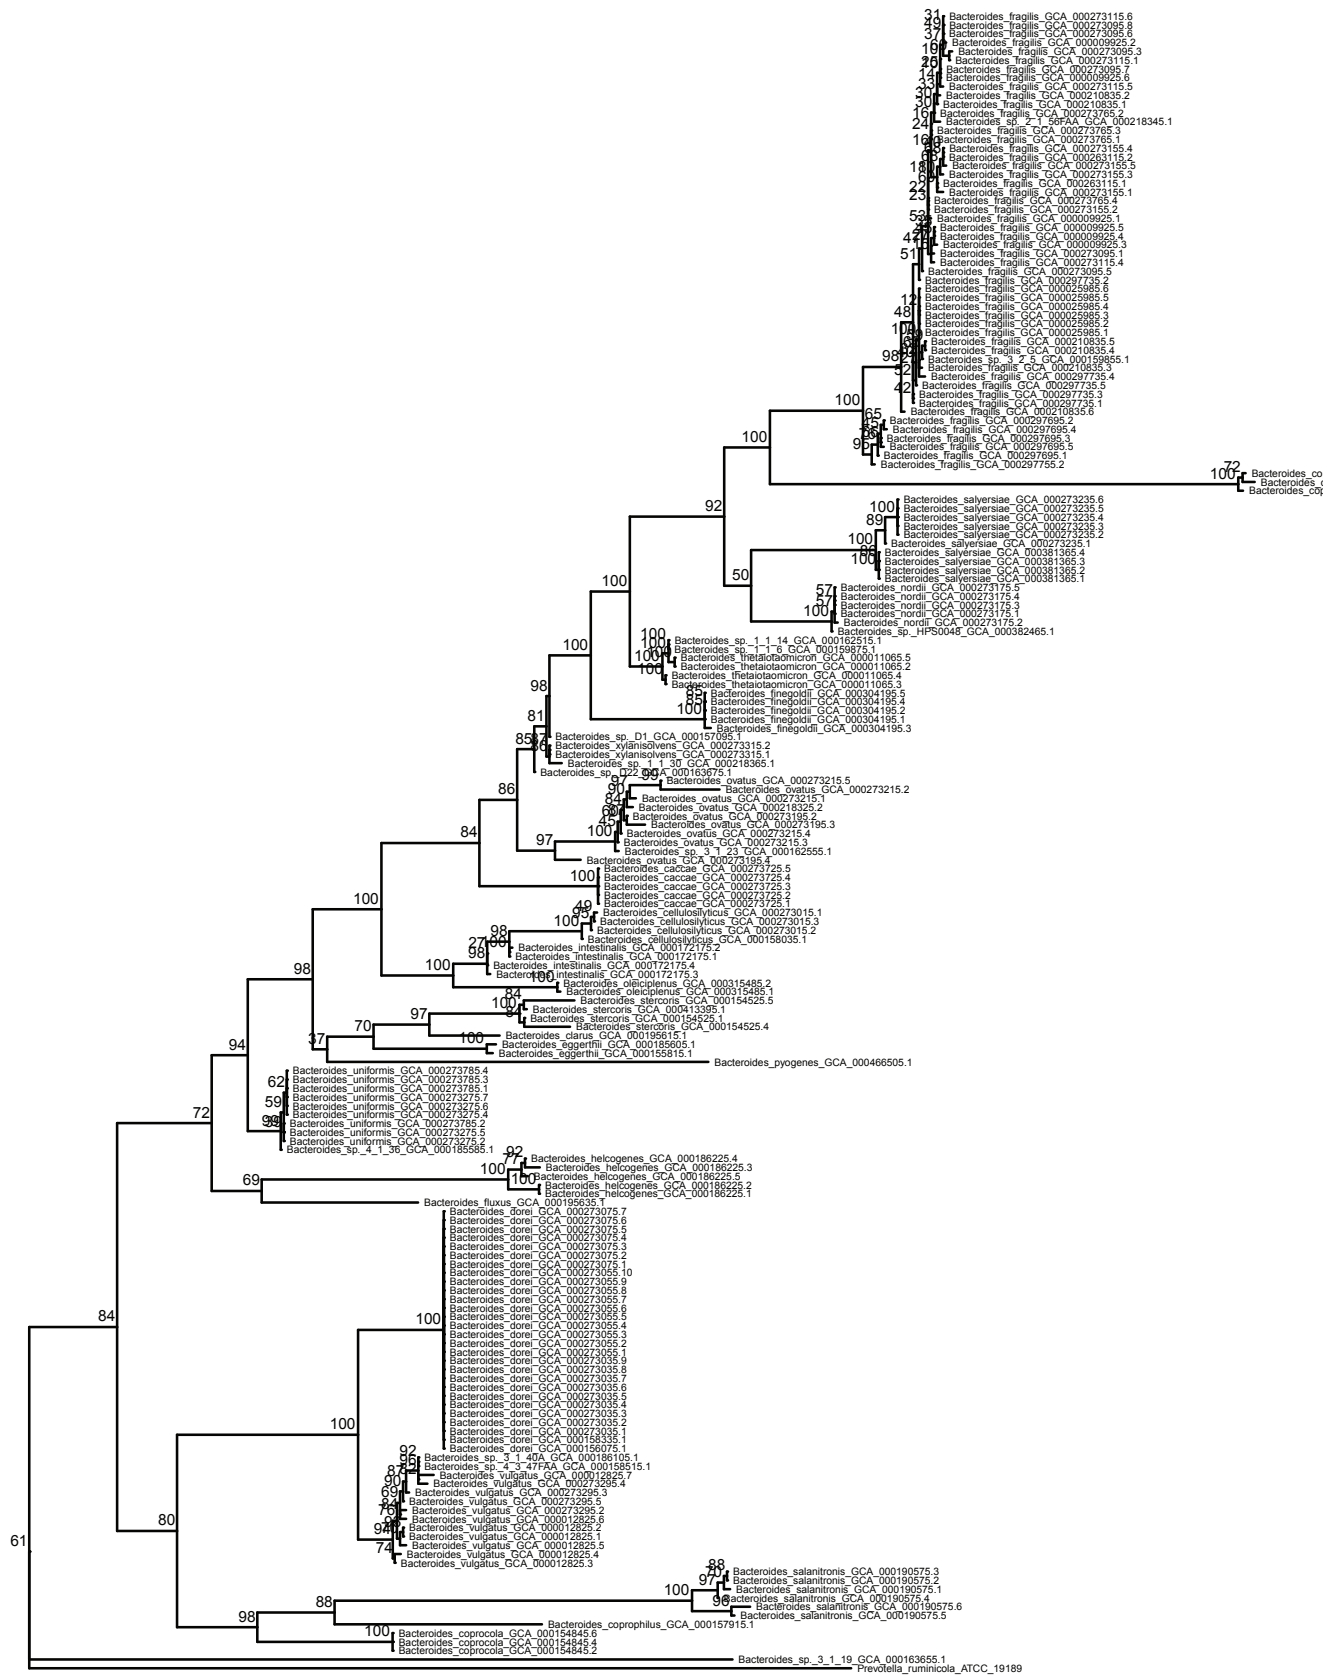

**Supplementary Figure 11:** Maximum likelihood tree showing the inferred phylogenetic relationship between all *Bacteroides* 16S rRNA gene sequences present in the Real Time Genomics (RTG) reference database. Bootstrap confidence estimates are provided for each tree branch.

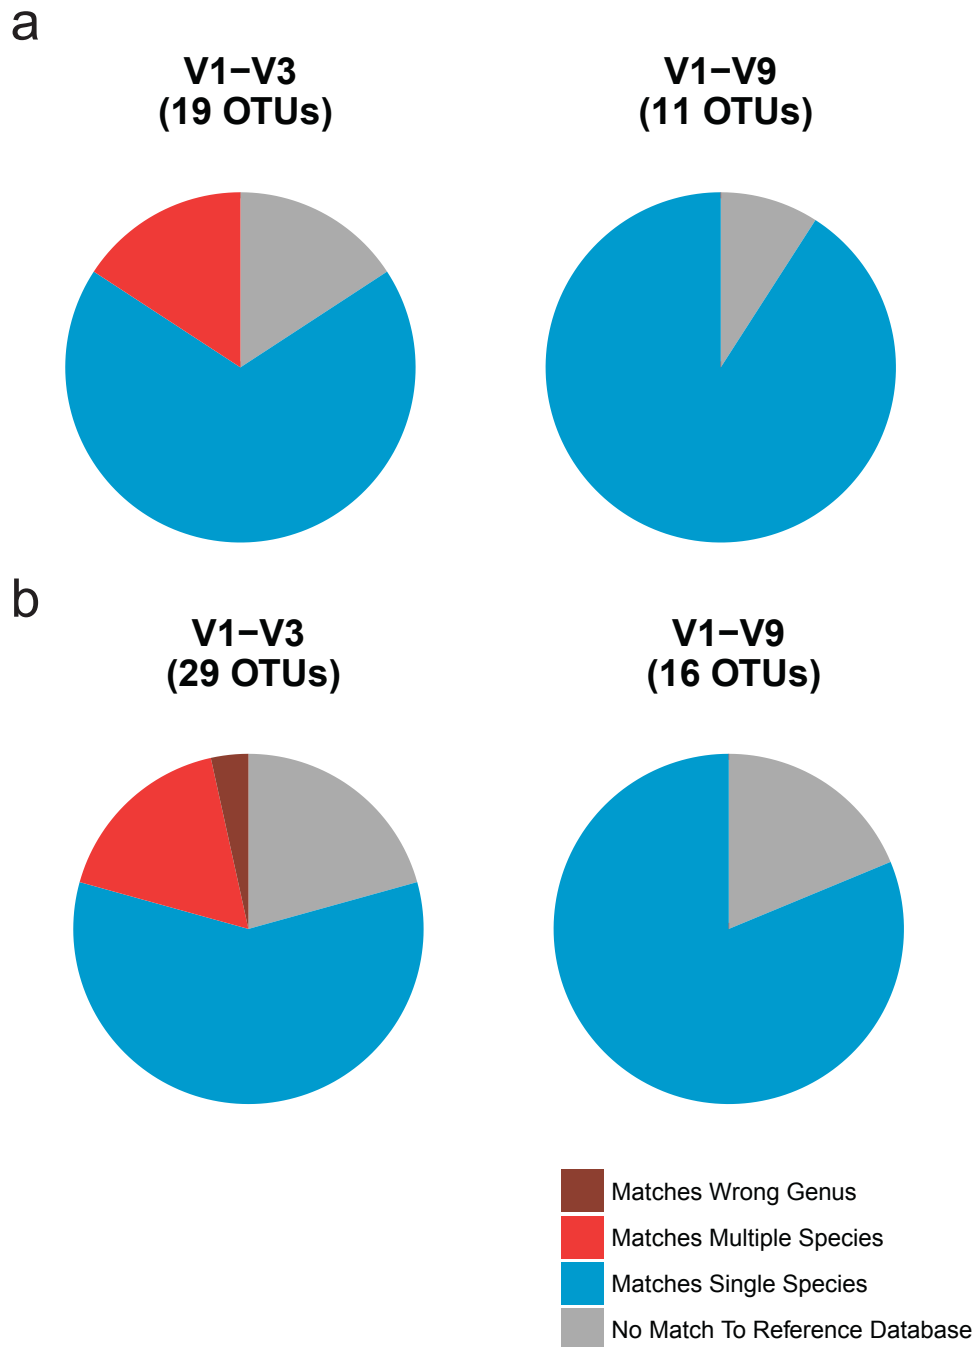

**Supplementary Figure 12:** The proportion of *Bacteroides* OTUs that could be assigned to a species by aligning the OTU sequence to the RTG reference database. Results are shown for V1-V3 amplicons generated using the Illumina MiSeq platform and V1-V9 amplicons generated using the PacBio RS II platform. OTU clustering was performed at a) 97% and b) 99% similarity thresholds.

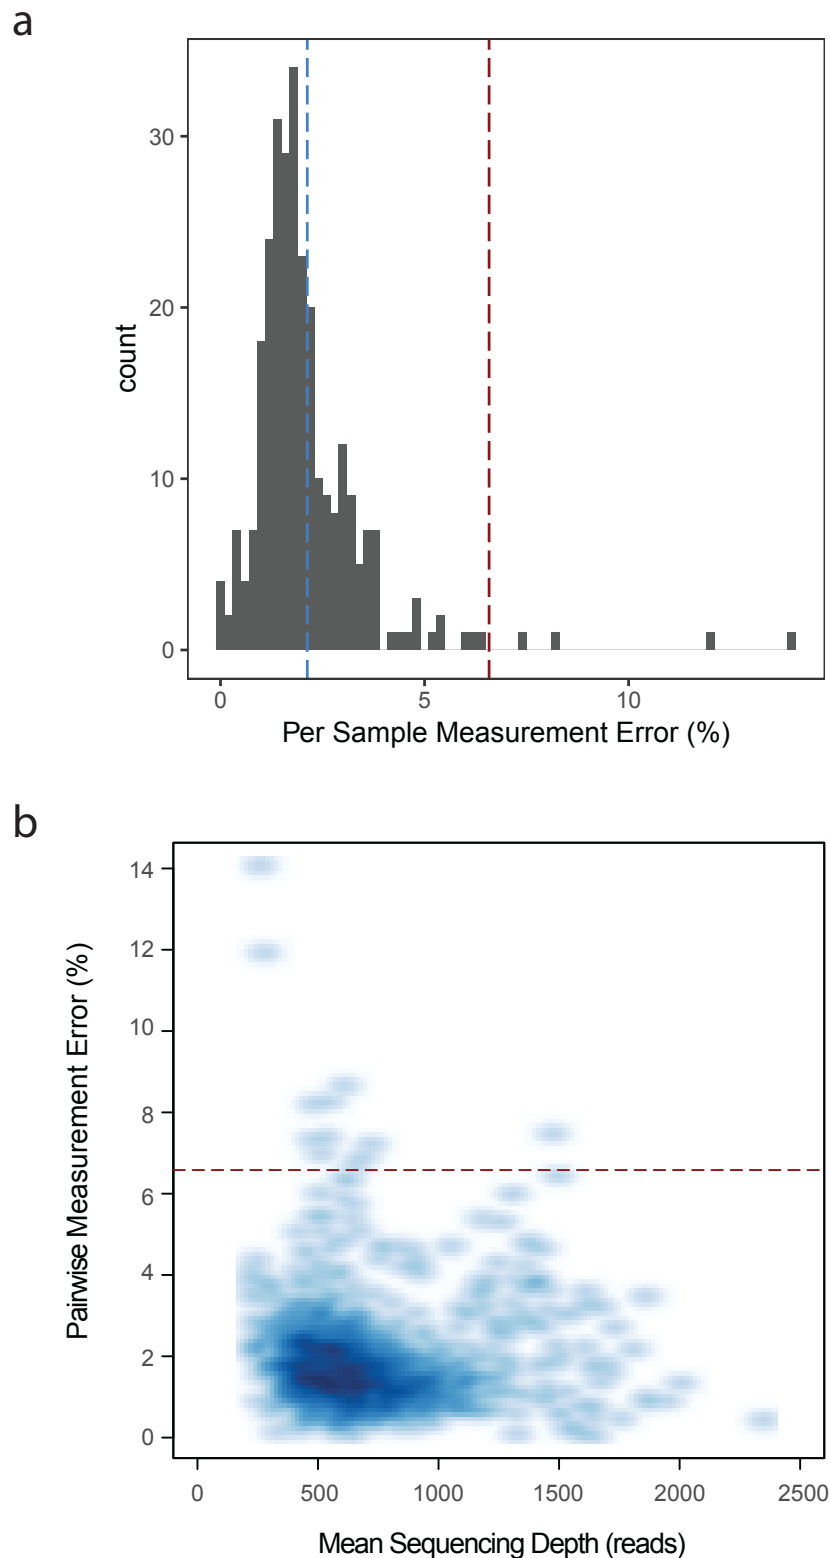

**Supplementary Figure 13:** Estimating measurement error attributable to sequencing platform and depth. a) Histogram showing the distribution in measurement error calculated for samples that were sequenced two or more times at different loading concentrations. b) Relationship between measurement error and mean sequencing depth for pairwise comparisons of the sequencing replicates for each sample. Dashed lines indicate the mean measurement error (blue) and the upper boundary for expected measurement error (red, calculated as 3 standard deviations above the mean measurement error) samples with measurement error above this upper boundary were dropped from subsequent analyses. Source data are provided as a Source Data file.

**Supplementary Table 1:** Primers used to annotate variable regions within 16S rRNA gene sequences.

| 16S Subregion | Forward Name | Forward Sequence     | Reverse Name | Reverse Sequence       | Expected size (bases) |
|---------------|--------------|----------------------|--------------|------------------------|-----------------------|
| V1-V2         | 27F          | AGAGTTTGATCMTGGCTCAG | 337R         | CYIACTGCTGCCTCCCGTAG   | 310                   |
| V4            | 515F         | GTGCCAGCMGCCGCGTAA   | 806R         | GGACTACHVGGGTWTCTAAT   | 219                   |
| V1-V3         | 27F          | AGAGTTTGATCCTGGCTCAG | 534R         | ATTACCGCGGCTGCTGG      | 507                   |
| V3-V5         | 357F         | CCTACGGGAGGCAGCAG    | 926R         | CCGTCAATTCMTTTRAGT     | 569                   |
| V6-V9         | 968F         | AACGCGAAGAACCTTAC    | 1492R        | TACGGYTACCTTGTTAYGACTT | 524                   |
| V1-V9         | 27F          | AGAGTTTGATCMTGGCTCAG | 1492R        | TACGGYTACCTTGTTAYGACTT | 1465                  |

**Supplementary Table 2:** Summary of sequences curated from public databases for *in silico* analysis.

a) Summary of the number of sequences remaining after curation. b) Summary of sequences discarded from greengenes database at each curation step. c) Summary of sequences discarded from HOMD at each curation step. During curation sequences were discarded if a match could not be made for one or more of the primers that delineate the variable regions included in this study, if a sequence contained ambiguous bases, or if the *in silico* sequence generated for a variable region was an unusual length (see Online Methods).

**a**

| Database   | Number of Sequences in Database With Genus-Level Identification | Number of Sequences Remaining After Filtering | Percent Sequences Remaining After Filtering |
|------------|-----------------------------------------------------------------|-----------------------------------------------|---------------------------------------------|
| greengenes | 93,463                                                          | 13,587                                        | 15%                                         |
| homd       | 832                                                             | 521                                           | 75%                                         |

**b**

| Reason for discarding   | Number of Sequences Discarded Per Subregion |       |       |       |      |       |
|-------------------------|---------------------------------------------|-------|-------|-------|------|-------|
|                         | V1-V2                                       | V1-V3 | V1-V9 | V3-V5 | V4   | V6-V9 |
| No primer match         | 3630                                        | 1374  | 47540 | 5     | 13   | 2656  |
| No forward primer match | 53322                                       | 53502 | 10383 | 2301  | 1494 | 1753  |
| No reverse primer match | 905                                         | 346   | 18415 | 180   | 326  | 59161 |
| Amplicon too short      | 1851                                        | 3369  | 153   | 340   | 827  | 192   |
| Amplicon contains Ns    | 719                                         | 992   | 1055  | 5959  | 3826 | 1075  |

**c**

| Reason for discarding   | Number of Sequences Discarded Per Subregion |       |       |       |    |       |
|-------------------------|---------------------------------------------|-------|-------|-------|----|-------|
|                         | V1-V2                                       | V1-V3 | V1-V9 | V3-V5 | V4 | V6-V9 |
| No primer match         | 0                                           | 0     | 0     | 0     | 0  | 5     |
| No forward primer match | 16                                          | 1     | 16    | 1     | 1  | 15    |
| No reverse primer match | 0                                           | 2     | 76    | 0     | 0  | 65    |
| Amplicon too short      | 24                                          | 24    | 27    | 11    | 17 | 24    |
| Amplicon contains Ns    | 14                                          | 19    | 45    | 21    | 11 | 23    |

**Supplementary Table 3:** Details of the 36 taxa present in the bacterial mock community. (a) 16 rRNA copy number was not available, thus it was calculated from the average copy number of the available species belonging to the same genus. (b) 16 rRNA copy number was not available neither in species nor the same genus, thus it was calculated from the average of the copy number of the species included in this mock community. (c) 16 rRNA copy number was not available thus it was calculated from the average copy number of the available strains belonging to the same species. (d) Genomic DNA was purchased directly from ATCC. (e) Supplemented with the same concentrations of cysteine and haemin and 0.6% (volume/volume) of lactic acid. (f) Supplemented with 0.5 g liter<sup>-1</sup> cysteine. (g) Supplemented with 0.5 g liter<sup>-1</sup> cysteine, 5 mg liter<sup>-1</sup> hemin and 1 mg liter<sup>-1</sup> menadione. Acronyms: BHI – Brain-Heart Infusion, TSB – Tryptic soy broth.

| 36 bacterial mock species                              | Body site       | 16S rRNA copies per genome | Strain (ATCC number) | Bacterial Culture method |
|--------------------------------------------------------|-----------------|----------------------------|----------------------|--------------------------|
| <i>Corynebacterium accolens</i>                        | airway          | 4.3 (a)                    | 49725                | ATCC medium 44, 260      |
| <i>Moraxella catarrhalis</i>                           | airway          | 4.5 (b)                    | 25240D-5 (d)         |                          |
| <i>Streptococcus pneumoniae</i>                        | airway          | 4.0                        | 700673               | ATCC medium 44, 260      |
| <i>Akkermansia muciniphila</i>                         | gut             | 3.0                        | BAA-835D-5 (d)       |                          |
| <i>Bacteroides caccae</i>                              | gut             | 6.0 (a)                    | 43185                | ATCC medium 1490         |
| <i>Bacteroides vulgatus</i>                            | gut             | 7.0                        | 8482D-5 (d)          |                          |
| <i>Enterococcus faecalis</i>                           | gut             | 4.0 (c)                    | 47077                | ATCC medium 2836         |
| <i>Escherichia coli</i>                                | gut             | 7.0 (c)                    | 700926D-5 (d)        |                          |
| <i>Faecalibacterium prausnitzii</i>                    | gut             | 4.5 (b)                    | 27766                | ATCC medium 1703         |
| <i>Ruminococcus lactaris</i>                           | gut             | 4.5 (b)                    | 29176                | ATCC medium 1490, 260    |
| <i>Bifidobacterium dentium</i>                         | gut/oral cavity | 4.0 (c)                    | 27678                | ATCC medium 2107, 260    |
| <i>Bifidobacterium longum</i> subsp. <i>infantis</i>   | gut/oral cavity | 3.7 (c)                    | 15697D-5 (d)         |                          |
| <i>Prevotella oralis</i>                               | gut/oral cavity | 4.0 (a)                    | 33269                | ATCC medium 1490         |
| <i>Actinomyces naeslundii</i> MG-1                     | oral cavity     | 3.0                        | 43146 (d)            | BHI medium               |
| <i>Corynebacterium matruchotti</i>                     | oral cavity     | 4.3 (a)                    | 33806                | ATCC medium 1490         |
| <i>Eubacterium brachy</i>                              | oral cavity     | 5.0 (a)                    | 33089                | ATCC medium 1015         |
| <i>Fusobacterium nucleatum</i> subsp. <i>nucleatum</i> | oral cavity     | 5.0                        | 25586                | BHI medium (f)           |
| <i>Lautropia mirabilis</i>                             | oral cavity     | 4.5 (b)                    | 51599                | ATCC medium 814          |
| <i>Porphyromonas gingivalis</i>                        | oral cavity     | 4.0                        | 33277                | TSB (g)                  |
| <i>Prevotella melaninogenica</i>                       | oral cavity     | 4.0 (a)                    | 25845                | ATCC medium 2863         |
| <i>Prevotella nigrescens</i>                           | oral cavity     | 4.0 (a)                    | 33563                | ATCC medium 2722, 260    |
| <i>Rothia dentocariosa</i>                             | oral cavity     | 3.0 (a)                    | 17931                | ATCC medium 44           |
| <i>Streptococcus mutans</i>                            | oral cavity     | 5.0                        | 25175                | BHI medium               |
| <i>Streptococcus sanguinis</i>                         | oral cavity     | 4.0                        | BAA-1455             | ATCC medium 44, 260      |
| <i>Tannerella forsythia</i>                            | oral cavity     | 4.5 (b)                    | 43037                | ATCC medium 1928, 1921   |
| <i>Treponema denticola</i>                             | oral cavity     | 2.0                        | 35405                | ATCC medium 1494, 260    |
| <i>Veillonella parvula</i>                             | oral cavity     | 4.0                        | 10790                | BHI medium (e)           |
| <i>Corynebacterium amycolatum</i>                      | skin            | 4.3 (a)                    | 700207               | ATCC medium 44           |
| <i>Propionibacterium acnes</i>                         | skin            | 2.0                        | 11828                | ATCC medium 2107, 260    |
| <i>Staphylococcus aureus</i> subsp. <i>aureus</i>      | skin            | 5.0                        | 700699D-5 (d)        |                          |
| <i>Gardnerella vaginalis</i>                           | vagina          | 4.5 (b)                    | 49145D-5 (d)         |                          |
| <i>Lactobacillus crispatus</i>                         | vagina          | 4.0 (c)                    | 55221                | ATCC medium 416          |
| <i>Lactobacillus gasseri</i>                           | vagina          | 6.0                        | 33323D-5 (d)         |                          |
| <i>Lactobacillus iners</i>                             | vagina          | 6.2 (a)                    | 55195                | ATCC medium 1685, 260    |
| <i>Lactobacillus jensenii</i>                          | vagina          | 6.2 (a)                    | 25258D (d)           |                          |
| <i>Streptococcus agalactiae</i>                        | vagina          | 7.0                        | BAA-611D-5 (d)       |                          |
